# Supplementary material for: Extracting the Interfacial Electrostatic Features from Experimentally Determined Antigen and/or Antibody-Related Structures inside Protein Data Bank for Machine Learning-Based Antibody Design
Source: Preprints.org preprint supplement (doi:10.20944/preprints202003.0011.v1), 2020-03-01
Supplement: Supplementary file 2 [file supplementary]

Article

# Extracting the Interfacial Electrostatic Features from Experimentally Determined Antigen and/or Antibody-Related Structures inside Protein Data Bank for Machine Learning-Based Antibody Design: Supplementary Materials

Wei Li \*

<sup>1</sup> Institute of Special Environment Medicine, Nantong University, No. 9, Seyuan Road, Nantong City, Jiangsu Province, P. R. China

\* Correspondence: wli148@aucklanduni.ac.nz

Received: date; Accepted: date; Published: date

---

| No. | PDB ID | Structure Title                                                                                                                                                                                                                        |
|-----|--------|----------------------------------------------------------------------------------------------------------------------------------------------------------------------------------------------------------------------------------------|
| 1   | 1A14   | Complex between nc10 anti-influenza virus neuraminidase single chain antibody with a 5 residue linker and influenza virus neuraminidase                                                                                                |
| 2   | 1A2Y   | Hen egg white lysozyme, d18a mutant, in complex with mouse monoclonal antibody d1.3                                                                                                                                                    |
| 3   | 1A7L   | Dominant b-cell epitope from the pres2 region of hepatitis b virus in the form of an inserted peptide segment in maltodextrin-binding protein                                                                                          |
| 4   | 1A7N   | Fv fragment of mouse monoclonal antibody d1.3 (balb/c, igg1, k) variant for chain l glu81->asp and chain h leu312->val                                                                                                                 |
| 5   | 1A7O   | Fv fragment of mouse monoclonal antibody d1.3 (balb/c, igg1, k) r96l deletion mutant on variant for chain l glu81->asp and chain h leu312->val                                                                                         |
| 6   | 1A7P   | Fv fragment of mouse monoclonal antibody d1.3 (balb/c, igg1, k) engineered mutant pro95l->ser on variant chain l glu81->asp and chain h leu312->val                                                                                    |
| 7   | 1A7Q   | Fv fragment of mouse monoclonal antibody d1.3 (balb/c, igg1, k) high affinity expressed variant containing ser26l->gly, ile29l->thr, glu81l->asp, thr97l->ser, pro240h->leu, asp258h->ala, lys281h->glu, asn283h->asp and leu312h->val |
| 8   | 1A7R   | Fv fragment of mouse monoclonal antibody d1.3 (balb/c, igg1, k) variant chain l glu81->asp                                                                                                                                             |
| 9   | 1ADQ   | Crystal structure of a human igm rheumatoid factor fab in complex with its autoantigen igg fc                                                                                                                                          |
| 10  | 1BJ1   | Vascular endothelial growth factor in complex with a neutralizing antibody                                                                                                                                                             |
| 11  | 1BLN   | Anti-p-glycoprotein fab mrk-16                                                                                                                                                                                                         |
| 12  | 1BQL   | Structure of an anti-hel fab fragment complexed with bobwhite quail lysozyme                                                                                                                                                           |
| 13  | 1BVK   | Humanized anti-lysozyme fv complexed with lysozyme                                                                                                                                                                                     |
| 14  | 1C08   | Crystal structure of hyhel-10 fv-hen lysozyme complex                                                                                                                                                                                  |
| 15  | 1C12   | Insight in odorant perception: the crystal structure and binding characteristics of antibody fragments directed against the musk odorant traseolide                                                                                    |
| 16  | 1CE1   | 1.9a structure of the therapeutic antibody campath-1h fab in complex with a synthetic peptide antigen                                                                                                                                  |
| 17  | 1CFS   | Anti-p24 (hiv-1) fab fragment cb41 complexed with an epitope-unrelated peptide                                                                                                                                                         |
| 18  | 1CFT   | Anti-p24 (hiv-1) fab fragment cb41 complexed with an epitope-unrelated d-peptide                                                                                                                                                       |
| 19  | 1CG9   | Complex recognition of the supertypic bw6-determinant on hla-b and-c molecules by the monoclonal antibody sfr8-b6                                                                                                                      |
| 20  | 1CLO   | Anti-carcinoembryonic antigen monoclonal antibody a5b7                                                                                                                                                                                 |
| 21  | 1CLY   | Igg fab (human igg1, kappa) chimeric fragment (cbr96) complexed with lewis y nonoate methyl ester                                                                                                                                      |
| 22  | 1CLZ   | Igg fab (igg3, kappa) fragment (mbr96) complexed with lewis y nonoate methyl ester                                                                                                                                                     |
| 23  | 1CS9   | Solution structure of cggirgera in contact with the monoclonal antibody mab 4x11, nmr, 7 structures                                                                                                                                    |
| 24  | 1CT6   | Solution structure of cggirgerg in contact with the monoclonal antibody mab 4x11, nmr, 11 structures                                                                                                                                   |
| 25  | 1CVQ   | Solution structure of the analogue retro-inverso mgregriggc in contact with the monoclonal antibody mab 4x11, nmr, 7 structures                                                                                                        |
| 26  | 1CW8   | Solution structure of the analogue retro-inverso (ma-r)regriggc in contact with the monoclonal antibody mab 4x11, nmr, 6 structures                                                                                                    |
| 27  | 1CWZ   | Solution structure of the analogue retro-inverso (ma-s)regriggc in contact with the monoclonal antibody mab 4x11, nmr, 7 structures                                                                                                    |
| 28  | 1CZ8   | Vascular endothelial growth factor in complex with an affinity matured antibody                                                                                                                                                        |
| 29  | 1DBJ   | Molecular basis of cross-reactivity and the limits of antibody-antigen complementarity                                                                                                                                                 |
| 30  | 1DBK   | Molecular basis of cross-reactivity and the limits of antibody-antigen complementarity                                                                                                                                                 |
| 31  | 1DBM   | Molecular basis of cross-reactivity and the limits of antibody-antigen complementarity                                                                                                                                                 |
| 32  | 1DEE   | Structure of s. aureus protein a bound to a human igm fab                                                                                                                                                                              |
| 33  | 1DLF   | High resolution crystal structure of the fv fragment from an anti-dansyl switch variant antibody igg2a(s) crystallized at ph 5.25                                                                                                      |
| 34  | 1DQD   | Crystal structure of fab hgr-2 f6, a competitive antagonist of the glucagon receptor                                                                                                                                                   |
| 35  | 1DQJ   | Crystal structure of the anti-lysozyme antibody hyhel-63 complexed with hen egg white lysozyme                                                                                                                                         |
| 36  | 1DQM   | Crystal structure of anti-lysozyme antibody                                                                                                                                                                                            |
| 37  | 1DQQ   | Crystal structure of anti-lysozyme antibody hyhel-63                                                                                                                                                                                   |
| 38  | 1DVF   | Idiotopic antibody d1.3 fv fragment-antiidiotopic antibody e5.2 fv fragment complex                                                                                                                                                    |
| 39  | 1DZB   | Crystal structure of phage library-derived single-chain fv fragment 1f9 in complex with turkey egg-white lysozyme                                                                                                                      |
| 40  | 1E07   | Model of human carcinoembryonic antigen by homology modelling and curve-fitting to experimental solution scattering data                                                                                                               |
| 41  | 1E4W   | Crossreactive binding of a circularized peptide to an anti-tgfalpha antibody fab-fragment                                                                                                                                              |
| 42  | 1E4X   | Crossreactive binding of a circularized peptide to an anti-tgfalpha antibody fab-fragment                                                                                                                                              |
| 43  | 1E6J   | Crystal structure of hiv-1 capsid protein (p24) in complex with fab13b5                                                                                                                                                                |
| 44  | 1E6O   | Crystal structure of fab13b5 against hiv-1 capsid protein p24                                                                                                                                                                          |
| 45  | 1EJO   | Fab fragment of neutralising monoclonal antibody 4c4 complexed with g-h loop from fmdv.                                                                                                                                                |
| 46  | 1EMT   | Fab antibody fragment of an c60 antifullerene antibody                                                                                                                                                                                 |
| 47  | 1ETZ   | The three-dimensional structure of an anti-sweetener fab, nc10.14, shows the extent of structural diversity in antigen recognition by immunoglobulins                                                                                  |
| 48  | 1F11   | F124 fab fragment from a monoclonal anti-pres2 antibody                                                                                                                                                                                |
| 49  | 1F2X   | Structure of the single-domain camelid antibody cab-ca05                                                                                                                                                                               |
| 50  | 1F3R   | Complex between fv antibody fragment and an analogue of the main immunogenic region of the acetylcholine receptor                                                                                                                      |
| 51  | 1F4W   | Crystal structure of an anti-carbohydrate antibody directed against vibrio cholerae o1 in complex with antigen                                                                                                                         |
| 52  | 1F4X   | Crystal structure of an anti-carbohydrate antibody directed against vibrio cholerae o1 in complex with antigen                                                                                                                         |
| 53  | 1F4Y   | Crystal structure of an anti-carbohydrate antibody directed against vibrio cholerae o1 in complex with antigen                                                                                                                         |
| 54  | 1F8T   | Fab (lnkb-2) of monoclonal antibody, crystal structure                                                                                                                                                                                 |

|     |      |                                                                                                                                                                                     |
|-----|------|-------------------------------------------------------------------------------------------------------------------------------------------------------------------------------------|
| 55  | 1F90 | Fab fragment of monoclonal antibody (lnkb-2) against human interleukin-2 in complex with antigenic peptide                                                                          |
| 56  | 1FBI | Crystal structure of a cross-reaction complex between fab f9.13.7 and guinea-fowl lysozyme                                                                                          |
| 57  | 1FCC | Crystal structure of the c2 fragment of streptococcal protein g in complex with the fc domain of human igg                                                                          |
| 58  | 1FDL | Crystallographic refinement of the three-dimensional structure of the fab d1.3-lysozyme complex at 2.5-angstroms resolution                                                         |
| 59  | 1FJ1 | Lyme disease antigen ospa in complex with neutralizing antibody fab la-2                                                                                                            |
| 60  | 1FRG | Crystal structure, sequence, and epitope mapping of a peptide complex of an anti-influenza ha peptide antibody fab 26(/s)9: fine-tuning antibody specificity                        |
| 61  | 1FUJ | Pr3 (myeloblastin)                                                                                                                                                                  |
| 62  | 1FVC | X-ray structures of the antigen-binding domains from three variants of humanized anti-p185-her2 antibody 4d5 and comparison with molecular modeling                                 |
| 63  | 1FVD | X-ray structures of the antigen-binding domains from three variants of humanized anti-p185-her2 antibody 4d5 and comparison with molecular modeling                                 |
| 64  | 1FVE | X-ray structures of the antigen-binding domains from three variants of humanized anti-p185-her2 antibody 4d5 and comparison with molecular modeling                                 |
| 65  | 1G6V | Complex of the camelid heavy-chain antibody fragment cab-ca05 with bovine carbonic anhydrase                                                                                        |
| 66  | 1G7H | Crystal structure of hen egg white lysozyme (hel) complexed with the mutant anti-hel monoclonal antibody d1.3(vlw92a)                                                               |
| 67  | 1G7I | Crystal structure of hen egg white lysozyme (hel) complexed with the mutant anti-hel monoclonal antibody d1.3 (vlw92f)                                                              |
| 68  | 1G7J | Crystal structure of hen egg white lysozyme (hel) complexed with the mutant anti-hel monoclonal antibody d1.3 (vlw92h)                                                              |
| 69  | 1G7L | Crystal structure of hen egg white lysozyme (hel) complexed with the mutant anti-hel monoclonal antibody d1.3 (vlw92s)                                                              |
| 70  | 1G7M | Crystal structure of hen egg white lysozyme (hel) complexed with the mutant anti-hel monoclonal antibody d1.3 (vlw92v)                                                              |
| 71  | 1G8Q | Crystal structure of human cd81 extracellular domain, a receptor for hepatitis c virus                                                                                              |
| 72  | 1G9M | Hiv-1 hxhc2 gp120 envelope glycoprotein complexed with cd4 and induced neutralizing antibody 17b                                                                                    |
| 73  | 1G9N | Hiv-1 yu2 gp120 envelope glycoprotein complexed with cd4 and induced neutralizing antibody 17b                                                                                      |
| 74  | 1GC1 | Hiv-1 gp120 core complexed with cd4 and a neutralizing human antibody                                                                                                               |
| 75  | 1GGB | Major antigen-induced domain rearrangements in an antibody                                                                                                                          |
| 76  | 1GGC | Major antigen-induced domain rearrangements in an antibody                                                                                                                          |
| 77  | 1GGI | Crystal structure of an hiv-1 neutralizing antibody 50.1 in complex with its v3 loop peptide antigen                                                                                |
| 78  | 1GPO | Crystal structure of the rationally designed antibody m41 as a fab fragment                                                                                                         |
| 79  | 1HCV | Llama heavy chain variable domain against alpha subunit of hcg (human chorionic gonadotropin)                                                                                       |
| 80  | 1HEZ | Antibody-antigen complex                                                                                                                                                            |
| 81  | 1HGD | Binding of influenza virus hemagglutinin to analogs of its cell-surface receptor, sialic acid: analysis by proton nuclear magnetic resonance spectroscopy and x-ray crystallography |
| 82  | 1HGE | Binding of influenza virus hemagglutinin to analogs of its cell-surface receptor, sialic acid: analysis by proton nuclear magnetic resonance spectroscopy and x-ray crystallography |
| 83  | 1HGF | Binding of influenza virus hemagglutinin to analogs of its cell-surface receptor, sialic acid: analysis by proton nuclear magnetic resonance spectroscopy and x-ray crystallography |
| 84  | 1HGG | Binding of influenza virus hemagglutinin to analogs of its cell-surface receptor, sialic acid: analysis by proton nuclear magnetic resonance spectroscopy and x-ray crystallography |
| 85  | 1HGH | Binding of influenza virus hemagglutinin to analogs of its cell-surface receptor, sialic acid: analysis by proton nuclear magnetic resonance spectroscopy and x-ray crystallography |
| 86  | 1HGI | Binding of influenza virus hemagglutinin to analogs of its cell-surface receptor, sialic acid: analysis by proton nuclear magnetic resonance spectroscopy and x-ray crystallography |
| 87  | 1HCJ | Binding of influenza virus hemagglutinin to analogs of its cell-surface receptor, sialic acid: analysis by proton nuclear magnetic resonance spectroscopy and x-ray crystallography |
| 88  | 1HIL | Structural evidence for induced fit as a mechanism for antigen-antibody recognition                                                                                                 |
| 89  | 1HIM | Structural evidence for induced fit as a mechanism for antibody-antigen recognition                                                                                                 |
| 90  | 1HIN | Structural evidence for induced fit as a mechanism for antibody-antigen recognition                                                                                                 |
| 91  | 1I8I | Crystal structure of dsfv mr1 in complex with the peptide antigen of the mutant epidermal growth factor receptor, egfrviii, at room temperature                                     |
| 92  | 1I8K | Crystal structure of dsfv mr1 in complex with the peptide antigen of the mutant epidermal growth factor receptor, egfrviii, at liquid nitrogen temperature                          |
| 93  | 1I8M | Crystal structure of a recombinant anti-single-stranded dna antibody fragment complexed with dt5                                                                                    |
| 94  | 1IC4 | Crystal structure of hyhel-10 fv mutant(hd32a)-hen lysozyme complex                                                                                                                 |
| 95  | 1IC5 | Crystal structure of hyhel-10 fv mutant(hd99a)-hen lysozyme complex                                                                                                                 |
| 96  | 1IC7 | Crystal structure of hyhel-10 fv mutant(hd32a99a)-hen lysozyme complex                                                                                                              |
| 97  | 1IFH | A detailed analysis of the free and bound conformation of an antibody: x-ray structures of anti-peptide fab 17(/s)9 and three different fab-peptide complexes                       |
| 98  | 1IGF | Crystal structures of an antibody to a peptide and its complex with peptide antigen at 2.8 angstroms                                                                                |
| 99  | 1IND | How the anti-(metal chelate) antibody cha255 is specific for the metal ion of its antigen: x-ray structures for two fab'(/s)hapten complexes with different metals in the chelate   |
| 100 | 1INE | How the anti-(metal chelate) antibody cha255 is specific for the metal ion of its antigen: x-ray structures for two fab'(/s)hapten complexes with different metals in the chelate   |
| 101 | 1IQW | Crystal structure of the fab fragment of the mouse anti-human fas antibody hfe7a                                                                                                    |
| 102 | 1IT9 | Crystal structure of an antigen-binding fragment from a humanized version of the anti-human fas antibody hfe7a                                                                      |
| 103 | 1J05 | The crystal structure of anti-carcinoembryonic antigen monoclonal antibody t84.66 fv fragment                                                                                       |

|     |      |                                                                                                                                          |
|-----|------|------------------------------------------------------------------------------------------------------------------------------------------|
| 104 | 1JIO | Crystal structure of hyhel-10 fv mutant ly50f complexed with hen egg white lysozyme                                                      |
| 105 | 1JIP | Crystal structure of hyhel-10 fv mutant ls91a complexed with hen egg white lysozyme                                                      |
| 106 | 1JIX | Crystal structure of hyhel-10 fv mutant ls93a complexed with hen egg white lysozyme                                                      |
| 107 | 1JFQ | Antigen-binding fragment of the murine anti-phenylarsonate antibody 36-71, 'fab 36-71'                                                   |
| 108 | 1JHL | Three-dimensional structure of a heteroclitic antigen-antibody cross-reaction complex                                                    |
| 109 | 1JP5 | Crystal structure of the single-chain fv fragment 1696 in complex with the epitope peptide corresponding to n-terminus of hiv-1 protease |
| 110 | 1JPS | Crystal structure of tissue factor in complex with humanized fab d3h44                                                                   |
| 111 | 1JPT | Crystal structure of fab d3h44                                                                                                           |
| 112 | 1JRH | Complex (antibody/antigen)                                                                                                               |
| 113 | 1JTO | Degenerate interfaces in antigen-antibody complexes                                                                                      |
| 114 | 1JTP | Degenerate interfaces in antigen-antibody complexes                                                                                      |
| 115 | 1JTT | Degenerate interfaces in antigen-antibody complexes                                                                                      |
| 116 | 1JV5 | Anti-blood group a fv                                                                                                                    |
| 117 | 1K6Q | Crystal structure of antibody fab fragment d3                                                                                            |
| 118 | 1KB5 | Murine t-cell receptor variable domain/fab complex                                                                                       |
| 119 | 1KC5 | Crystal structure of antibody pc287 in complex with ps1 peptide                                                                          |
| 120 | 1KCR | Crystal structure of antibody pc283 in complex with ps1 peptide                                                                          |
| 121 | 1KCS | Crystal structure of antibody pc282 in complex with ps1 peptide                                                                          |
| 122 | 1KIP | Fv mutant y(b 32)a (vh domain) of mouse monoclonal antibody d1.3 complexed with hen egg white lysozyme                                   |
| 123 | 1KIQ | Fv mutant y(b 101)f (vh domain) of mouse monoclonal antibody d1.3 complexed with hen egg white lysozyme                                  |
| 124 | 1KIR | Fv mutant y(a 50)s (vl domain) of mouse monoclonal antibody d1.3 complexed with hen egg white lysozyme                                   |
| 125 | 1KTR | Crystal structure of the anti-his tag antibody 3d5 single-chain fragment (scfv) in complex with a oligohistidine peptide                 |
| 126 | 1L7I | Crystal structure of the anti-erb2 fab2c4                                                                                                |
| 127 | 1LK3 | Engineered human interleukin-10 monomer complexed to 9d7 fab fragment                                                                    |
| 128 | 1M7I | Crystal structure of a monoclonal fab specific for shigella flexneri y lipopolysaccharide                                                |
| 129 | 1M7D | Crystal structure of a monoclonal fab specific for shigella flexneri y lipopolysaccharide complexed with a trisaccharide                 |
| 130 | 1M7I | Crystal structure of a monoclonal fab specific for shigella flexneri y lipopolysaccharide complexed with a pentasaccharide               |
| 131 | 1MCO | Three-dimensional structure of a human immunoglobulin with a hinge deletion                                                              |
| 132 | 1MEL | Crystal structure of a camel single-domain vh antibody fragment in complex with lysozyme                                                 |
| 133 | 1MFA | Structure of a single-chain fv fragment complexed with a carbohydrate antigen at 1.7 angstroms resolution                                |
| 134 | 1MFB | High resolution structures of antibody fab fragment complexed with cell-surface oligosaccharide of pathogenic salmonella                 |
| 135 | 1MFC | High resolution structures of antibody fab fragment complexed with cell-surface oligosaccharide of pathogenic salmonella                 |
| 136 | 1MHH | Structure of p. magnus protein l mutant bound to a mouse fab                                                                             |
| 137 | 1MLB | Monoclonal antibody fab d44.1 raised against chicken egg-white lysozyme                                                                  |
| 138 | 1MLC | Monoclonal antibody fab d44.1 raised against chicken egg-white lysozyme complexed with lysozyme                                          |
| 139 | 1N64 | Crystal structure analysis of the immunodominant antigenic site on hepatitis c virus protein bound to mab 19d9d6                         |
| 140 | 1NBY | Crystal structure of hyhel-63 complexed with hel mutant k96a                                                                             |
| 141 | 1NBZ | Crystal structure of hyhel-63 complexed with hel mutant k97a                                                                             |
| 142 | 1NDG | Crystal structure of fab fragment of antibody hyhel-8 complexed with its antigen lysozyme                                                |
| 143 | 1NDM | Crystal structure of fab fragment of antibody hyhel-26 complexed with lysozyme                                                           |
| 144 | 1NGW | Chimeric affinity matured fab 7g12 complexed with mesoporphyrin                                                                          |
| 145 | 1NGX | Chimeric germline fab 7g12 with jeffamine fragment bound                                                                                 |
| 146 | 1NGY | Chimeric mature fab 7g12-apo                                                                                                             |
| 147 | 1NGZ | Chimeric germline fab 7g12-apo                                                                                                           |
| 148 | 1NLB | Crystal structure of anti-hcv monoclonal antibody 19d9d6                                                                                 |
| 149 | 1NMC | Complex between nc10 anti-influenza virus neuraminidase single chain antibody with a 15 residue linker and influenza virus neuraminidase |
| 150 | 1OB1 | Crystal structure of a fab complex with plasmodium falciparum msp1-19                                                                    |
| 151 | 1OP9 | Complex of human lysozyme with camelid vhh hl6 antibody fragment                                                                         |
| 152 | 1OSP | Crystal structure of outer surface protein a of borrelia burgdorferi complexed with a murine monoclonal antibody fab                     |
| 153 | 1OW0 | Crystal structure of human fcari bound to iga1-fc                                                                                        |
| 154 | 1P2C | Crystal structure analysis of an anti-lysozyme antibody                                                                                  |
| 155 | 1P4B | Three-dimensional structure of a single chain fv fragment complexed with the peptide gcn4(7p-14p).                                       |
| 156 | 1P7K | Crystal structure of an anti-ssdna antigen-binding fragment (fab) bound to 4-(2-hydroxyethyl)piperazine-1-ethanesulfonic acid (hepes)    |
| 157 | 1PG7 | Murine 6a6 fab in complex with humanized anti-tissue factor d3h44 fab                                                                    |
| 158 | 1PSK | The crystal structure of an fab fragment that binds to the melanoma-associated gd2 ganglioside                                           |
| 159 | 1PZ5 | Structural basis of peptide-carbohydrate mimicry in an antibody combining site                                                           |
| 160 | 1Q9K | S25-2 fab unliganded 1                                                                                                                   |
| 161 | 1Q9L | S25-2 fab unliganded 2                                                                                                                   |
| 162 | 1Q9O | S45-18 fab unliganded                                                                                                                    |
| 163 | 1Q9W | S45-18 fab pentasaccharide bisphosphate complex                                                                                          |
| 164 | 1QBL | Fab e8 (fabe8a) x-ray structure at 2.26 angstrom resolution                                                                              |

|     |      |                                                                                                                                                                    |
|-----|------|--------------------------------------------------------------------------------------------------------------------------------------------------------------------|
| 165 | 1QBM | Fab e8b antibody, x-ray structure at 2.37 angstroms resolution                                                                                                     |
| 166 | 1QGC | Structure of the complex of a fab fragment of a neutralizing antibody with foot and mouth disease virus                                                            |
| 167 | 1QKZ | Fab fragment (mn14c11.6) in complex with a peptide antigen derived from neisseria meningitidis p1.7 serosubtype antigen and domain ii from streptococcal protein g |
| 168 | 1QOK | Mfe-23 an anti-carcinoembryonic antigen single-chain fv antibody                                                                                                   |
| 169 | 1R21 | Solution structure of human ki67 fha domain                                                                                                                        |
| 170 | 1RZJ | Hiv-1 hxbc2 gp120 envelope glycoprotein complexed with cd4 and induced neutralizing antibody 17b                                                                   |
| 171 | 1RZK | Hiv-1 yu2 gp120 envelope glycoprotein complexed with cd4 and induced neutralizing antibody 17b                                                                     |
| 172 | 1S3K | Crystal structure of a humanized fab (hu3s193) in complex with the lewis y tetrasaccharide                                                                         |
| 173 | 1S4H | Nmr structure of cross-reactive peptides from l. braziliensis                                                                                                      |
| 174 | 1S4J | Nmr structure of cross-reactive peptides from homo sapiens                                                                                                         |
| 175 | 1SSI | Fab (lnkb-2) of monoclonal antibody to human interleukin-2, crystal structure                                                                                      |
| 176 | 1S78 | Insights into erbb signaling from the structure of the erbb2-pertuzumab complex                                                                                    |
| 177 | 1SM3 | Crystal structure of the tumor specific antibody sm3 complex with its peptide epitope                                                                              |
| 178 | 1SQ2 | Crystal structure analysis of the nurse shark new antigen receptor (nar) variable domain in complex with lysozyme                                                  |
| 179 | 1SVZ | Crystal structure of the single-chain fv fragment 1696 in complex with the epitope peptide corresponding to n-terminus of hiv-2 protease                           |
| 180 | 1T2Q | The crystal structure of an nna7 fab that recognizes an n-type blood group antigen                                                                                 |
| 181 | 1T6V | Crystal structure analysis of the nurse shark new antigen receptor (nar) variable domain in complex with lysozyme                                                  |
| 182 | 1TOR | Molecular dynamics simulation from 2d-nmr data of the freeachr mir decapeptide and the antibody-bound [a76]mir analogue                                            |
| 183 | 1TOS | Torpedo californicaachr receptor [ala76] analogue complexed with the anti-acetylcholine mab6 monoclonal antibody                                                   |
| 184 | 1TYE | Structural basis for allostery in integrins and binding of ligand-mimetic therapeutics to the platelet receptor for fibrinogen                                     |
| 185 | 1TZH | Crystal structure of the fab yads1 complexed with h-vegf                                                                                                           |
| 186 | 1TZI | Crystal structure of the fab yads2 complexed with h-vegf                                                                                                           |
| 187 | 1U6A | Crystal structure of the broadly neutralizing anti-hiv fab f105                                                                                                    |
| 188 | 1UA6 | Crystal structure of hyhel-10 fv mutant sfsf complexed with hen egg white lysozyme complex                                                                         |
| 189 | 1UAC | Crystal structure of hyhel-10 fv mutant sfsf complexed with turkey white lysozyme                                                                                  |
| 190 | 1UCB | Structure of uncomplexed fab compared to complex (1cly, 1clz)                                                                                                      |
| 191 | 1UJ3 | Crystal structure of a humanized fab fragment of anti-tissue-factor antibody in complex with tissue factor                                                         |
| 192 | 1UWX | P1.2 serosubtype antigen derived from n. meningitidis pora in complex with fab fragment                                                                            |
| 193 | 1UZ6 | Anti-lewis x fab fragment uncomplexed                                                                                                                              |
| 194 | 1UZ8 | Anti-lewis x fab fragment in complex with lewis x                                                                                                                  |
| 195 | 1V7M | Human thrombopoietin functional domain complexed to neutralizing antibody tn1 fab                                                                                  |
| 196 | 1V7N | Human thrombopoietin functional domain complexed to neutralizing antibody tn1 fab                                                                                  |
| 197 | 1VER | Structure of new antigen receptor variable domain from sharks                                                                                                      |
| 198 | 1VES | Structure of new antigen receptor variable domain from sharks                                                                                                      |
| 199 | 1VFA | Bound water molecules and conformational stabilization help mediate an antigen-antibody association                                                                |
| 200 | 1VFB | Bound water molecules and conformational stabilization help mediate an antigen-antibody association                                                                |
| 201 | 1W72 | Crystal structure of hla-a1:mage-a1 in complex with fab-hyb3                                                                                                       |
| 202 | 1WEJ | Igg1 fab fragment (of e8 antibody) complexed with horse cytochrome c at 1.8 a resolution                                                                           |
| 203 | 1WZ1 | Crystal structure of the fv fragment complexed with dansyl-lysine                                                                                                  |
| 204 | 1XF2 | Structure of fab dna-1 complexed with dt3                                                                                                                          |
| 205 | 1XGY | Crystal structure of anti-meta i rhodopsin fab fragment k42-411                                                                                                    |
| 206 | 1XIW | Crystal structure of human cd3-e/d dimer in complex with a ucht1 single-chain antibody fragment                                                                    |
| 207 | 1YC7 | Caban33 vhh fragment against vsg                                                                                                                                   |
| 208 | 1YC8 | Caban33- y37v/e44g/r45l triple mutant                                                                                                                              |
| 209 | 1YEI | Catalytic antibody d2.3 complex                                                                                                                                    |
| 210 | 1YEJ | Catalytic antibody complex                                                                                                                                         |
| 211 | 1YEK | Catalytic antibody d2.3 complex                                                                                                                                    |
| 212 | 1YNT | Structure of the monomeric form of t. gondii sag1 surface antigen bound to a human fab                                                                             |
| 213 | 1YQV | The crystal structure of the antibody fab hyhel5 complex with lysozyme at 1.7a resolution                                                                          |
| 214 | 1YYL | Crystal structure of cd4m33, a scorpion-toxin mimic of cd4, in complex with hiv-1 yu2 gp120 envelope glycoprotein and anti-hiv-1 antibody 17b                      |
| 215 | 1YYM | Crystal structure of f23, a scorpion-toxin mimic of cd4, in complex with hiv-1 yu2 gp120 envelope glycoprotein and anti-hiv-1 antibody 17b                         |
| 216 | 1YZZ | Humanized caban33 at room temperature                                                                                                                              |
| 217 | 1ZEA | Structure of the anti-cholera toxin antibody fab fragment te33 in complex with a d-peptide                                                                         |
| 218 | 1ZMY | Cabbcii-10 vhh framework with cdr loops of cablys3 grafted on it and in complex with hen egg white lysozyme                                                        |
| 219 | 2AAB | Structural basis of antigen mimicry in a clinically relevant melanoma antigen system                                                                               |
| 220 | 2ARJ | Cd8alpha-alpha in complex with yts 105.18 fab                                                                                                                      |
| 221 | 2B2X | Vla1 rdeltah i-domain complexed with a quadruple mutant of the aqc2 fab                                                                                            |
| 222 | 2B4C | Crystal structure of hiv-1 jr-fl gp120 core protein containing the third variable region (v3) complexed with cd4 and the x5 antibody                               |
| 223 | 2BDN | Crystal structure of human mcp-1 bound to a blocking antibody, 11k2                                                                                                |
| 224 | 2BJM | Spe7:anthrone complex                                                                                                                                              |
| 225 | 2BRR | Complex of the neisserial pora p1.4 epitope peptide and two fab- fragments (antibody mn20b9.34)                                                                    |

|     |      |                                                                                                                                                                  |
|-----|------|------------------------------------------------------------------------------------------------------------------------------------------------------------------|
| 226 | 2COQ | Structure of new antigen receptor variable domain from sharks                                                                                                    |
| 227 | 2D03 | Crystal structure of the g91s mutant of the nna7 fab                                                                                                             |
| 228 | 2DBL | Molecular basis of cross-reactivity and the limits of antibody-antigen complementarity                                                                           |
| 229 | 2DLF | High resolution crystal structure of the fv fragment from an anti-dansyl switch variant antibody igg2a(s) crystallized at ph 6.75                                |
| 230 | 2DQC | Crystal structure of hyhel-10 fv mutant(hy33f) complexed with hen egg lysozyme                                                                                   |
| 231 | 2DQD | Crystal structure of hyhel-10 fv mutant (hy50f) complexed with hen egg lysozyme                                                                                  |
| 232 | 2DQE | Crystal structure of hyhel-10 fv mutant (hy53a) complexed with hen egg lysozyme                                                                                  |
| 233 | 2DQF | Crystal structure of hyhel-10 fv mutant (y33ay53a) complexed with hen egg lysozyme                                                                               |
| 234 | 2DQG | Crystal structure of hyhel-10 fv mutant (hy53f) complexed with hen egg lysozyme                                                                                  |
| 235 | 2DQH | Crystal structure of hyhel-10 fv mutant (hy58a) complexed with hen egg lysozyme                                                                                  |
| 236 | 2DQI | Crystal structure of hyhel-10 fv mutant (ly50a) complexed with hen egg lysozyme                                                                                  |
| 237 | 2DQJ | Crystal structure of hyhel-10 fv (wild-type) complexed with hen egg lysozyme at 1.8a resolution                                                                  |
| 238 | 2DQT | High resolution crystal structure of the complex of the hydrolytic antibody fab 6d9 and a transition-state analog                                                |
| 239 | 2DQU | Crystal form ii: high resolution crystal structure of the complex of the hydrolytic antibody fab 6d9 and a transition-state analog                               |
| 240 | 2FB4 | Dir primaerstruktur des kristallisierbaren monoklonalen immunoglobulins igg1 kol. ii. aminosaeuresequenz der l-kette, lambda-typ, subgruppe i (german)           |
| 241 | 2FD6 | Structure of human urokinase plasminogen activator in complex with urokinase receptor and an anti-upar antibody at 1.9 a                                         |
| 242 | 2FR4 | Structure of fab dna-1 complexed with a stem-loop dna ligand                                                                                                     |
| 243 | 2H32 | Crystal structure of the pre-b cell receptor                                                                                                                     |
| 244 | 2H9G | Crystal structure of phage derived fab bdf1 with human death receptor 5 (dr5)                                                                                    |
| 245 | 2HFG | Crystal structure of hbr3 bound to cb3s-fab                                                                                                                      |
| 246 | 2HKF | Crystal structure of the complex fab m75- peptide                                                                                                                |
| 247 | 2HMG | Refinement of the influenza virus hemagglutinin by simulated annealing                                                                                           |
| 248 | 2HQ6 | Structure of the cyclophilin_cecyp16-like domain of the serologically defined colon cancer antigen 10 from homo sapiens                                          |
| 249 | 2HRP | Antigen-antibody complex                                                                                                                                         |
| 250 | 2I24 | Crystal structure analysis of the nurse shark new antigen receptor pbla8 variable domain                                                                         |
| 251 | 2I25 | Crystal structure analysis of the nurse shark new antigen receptor pbla8 variable domain in complex with lysozyme                                                |
| 252 | 2I26 | Crystal structure analysis of the nurse shark new antigen receptor ancestral variable domain in complex with lysozyme                                            |
| 253 | 2I27 | Crystal structure analysis of the nurse shark new antigen receptor ancestral variable domain                                                                     |
| 254 | 2I5Y | Crystal structure of cd4m47, a scorpion-toxin mimic of cd4, in complex with hiv-1 yu2 gp120 envelope glycoprotein and anti-hiv-1 antibody 17b                    |
| 255 | 2I60 | Crystal structure of [phe23]m47, a scorpion-toxin mimic of cd4, in complex with hiv-1 yu2 gp120 envelope glycoprotein and anti-hiv-1 antibody 17b                |
| 256 | 2IFF | Structure of an antibody-lysozyme complex: effect of a conservative mutation                                                                                     |
| 257 | 2IG2 | Dir primaerstruktur des kristallisierbaren monoklonalen immunoglobulins igg1 kol. ii. aminosaeuresequenz der l-kette, lambda-typ, subgruppe i (german)           |
| 258 | 2IGF | Crystal structures of an antibody to a peptide and its complex with peptide antigen at 2.8 angstroms                                                             |
| 259 | 2IHL | Lysozyme (e.c.3.2.1.17) (japanese quail)                                                                                                                         |
| 260 | 2J4W | Structure of a plasmodium vivax apical membrane antigen 1-fab f8.12.19 complex                                                                                   |
| 261 | 2J5L | Structure of a plasmodium falciparum apical membrane antigen 1-fab f8. 12.19 complex                                                                             |
| 262 | 2JB6 | Fab fragment in complex with scriptsize molecule hapten, crystal form-2                                                                                          |
| 263 | 2JEL | Jel42 fab/hpr complex                                                                                                                                            |
| 264 | 2MCP | Refined crystal structure of the mc/pc603 fab-phosphocholine complex at 3.1 angstroms resolution                                                                 |
| 265 | 2MKL | Solution structure of the fourth constant immunoglobulin domain of nurse shark ignar                                                                             |
| 266 | 2MTW | Evidence supporting the hypothesis that specifically modifying a malaria peptide to fit into hla-dr 1*03 molecules induces antibody production and protection    |
| 267 | 2NXY | Hiv-1 gp120 envelope glycoprotein(s334a) complexed with cd4 and antibody 17b                                                                                     |
| 268 | 2NXZ | Hiv-1 gp120 envelope glycoprotein (t257s, s334a, s375w) complexed with cd4 and antibody 17b                                                                      |
| 269 | 2NY0 | Hiv-1 gp120 envelope glycoprotein (m95w, w96c, t257s, v275c, s334a, s375w, a433m) complexed with cd4 and antibody 17b                                            |
| 270 | 2NY1 | Hiv-1 gp120 envelope glycoprotein (i109c, t257s, s334a, s375w, q428c) complexed with cd4 and antibody 17b                                                        |
| 271 | 2NY2 | Hiv-1 gp120 envelope glycoprotein (t123c, t257s, s334a, s375w, g431c) complexed with cd4 and antibody 17b                                                        |
| 272 | 2NY3 | Hiv-1 gp120 envelope glycoprotein (k231c, t257s, e267c, s334a, s375w) complexed with cd4 and antibody 17b                                                        |
| 273 | 2NY4 | Hiv-1 gp120 envelope glycoprotein (k231c, t257s, e268c, s334a, s375w) complexed with cd4 and antibody 17b                                                        |
| 274 | 2NY5 | Hiv-1 gp120 envelope glycoprotein (m95w, w96c, i109c, t257s, v275c, s334a, s375w, q428c, a433m) complexed with cd4 and antibody 17b                              |
| 275 | 2NY6 | Hiv-1 gp120 envelope glycoprotein (m95w, w96c, i109c, t123c, t257s, v275c,s334a, s375w, q428c, g431c) complexed with cd4 and antibody 17b                        |
| 276 | 2NY7 | Hiv-1 gp120 envelope glycoprotein complexed with the broadly neutralizing cd4-binding-site antibody b12                                                          |
| 277 | 2OR9 | The structure of the anti-c-myc antibody 9e10 fab fragment/epitope peptide complex reveals a novel binding mode dominated by the heavy chain hypervariable loops |
| 278 | 2ORB | The structure of the anti-c-myc antibody 9e10 fab fragment                                                                                                       |
| 279 | 2OSL | Crystal structure of rituximab fab in complex with an epitope peptide                                                                                            |
| 280 | 2OTU | Crystal structure of fv polyglutamine complex                                                                                                                    |
| 281 | 2OTW | Crystal structure of fv polyglutamine complex                                                                                                                    |

|     |      |                                                                                                                                                                                                         |
|-----|------|---------------------------------------------------------------------------------------------------------------------------------------------------------------------------------------------------------|
| 282 | 2P8L | Crystal structure of the hiv-1 cross neutralizing monoclonal antibody 2f5 in complex with gp41 peptide elleldkwaslwn                                                                                    |
| 283 | 2P8M | Crystal structure of the hiv-1 cross neutralizing monoclonal antibody 2f5 in complex with gp41 peptide elleldkwaslwn in new crystal form                                                                |
| 284 | 2P8P | Crystal structure of the hiv-1 cross neutralizing monoclonal antibody 2f5 in complex with gp41 peptide leldkwaslw[n-ac]                                                                                 |
| 285 | 2PR4 | Crystal structure of fab' from the hiv-1 neutralizing antibody 2f5                                                                                                                                      |
| 286 | 2Q8A | Structure of the malaria antigen ama1 in complex with a growth-inhibitory antibody                                                                                                                      |
| 287 | 2Q8B | Structure of the malaria antigen ama1 in complex with a growth-inhibitory antibody                                                                                                                      |
| 288 | 2QAD | Structure of tyrosine-sulfated 412d antibody complexed with hiv-1 yu2 gp120 and cd4                                                                                                                     |
| 289 | 2QQI | Crystal structure of the b1b2 domains from human neuropilin-1                                                                                                                                           |
| 290 | 2QQM | Crystal structure of the a2b1b2 domains from human neuropilin-1                                                                                                                                         |
| 291 | 2QQN | Neuropilin-1 b1 domain in complex with a vegf-blocking fab                                                                                                                                              |
| 292 | 2R29 | Neutralization of dengue virus by a serotype cross-reactive antibody elucidated by cryoelectron microscopy and x-ray crystallography                                                                    |
| 293 | 2R69 | Crystal structure of fab 1a1d-2 complexed with e-diii of dengue virus at 3.8 angstrom resolution                                                                                                        |
| 294 | 2RLL | Ccr5 nt(7-15)                                                                                                                                                                                           |
| 295 | 2UYL | Crystal structure of a monoclonal antibody directed against an antigenic determinant common to ogawa and inaba serotypes of vibrio cholerae o1                                                          |
| 296 | 2VC2 | Re-refinement of integrin alphaiibbeta3 headpiece bound to antagonist l-739758                                                                                                                          |
| 297 | 2VDK | Re-refinement of integrin alphaiibbeta3 headpiece                                                                                                                                                       |
| 298 | 2VDL | Re-refinement of integrin alphaiibbeta3 headpiece                                                                                                                                                       |
| 299 | 2VDM | Re-refinement of integrin alphaiibbeta3 headpiece bound to antagonist tirofiban                                                                                                                         |
| 300 | 2VDN | Re-refinement of integrin alphaiibbeta3 headpiece bound to antagonist eptifibatide                                                                                                                      |
| 301 | 2VDO | Integrin alphaiibbeta3 headpiece bound to fibrinogen gamma chain peptide, hhlggakqagdv                                                                                                                  |
| 302 | 2VDP | Integrin alphaiibbeta3 headpiece bound to fibrinogen gamma chain peptide,lggakqagdv                                                                                                                     |
| 303 | 2VDQ | Integrin alphaiibbeta3 headpiece bound to a chimeric fibrinogen gamma chain peptide, hhlggakqrgdv                                                                                                       |
| 304 | 2VDR | Integrin alphaiibbeta3 headpiece bound to a chimeric fibrinogen gamma chain peptide, lggakqrgdv                                                                                                         |
| 305 | 2VIR | Influenza virus hemagglutinin complexed with a neutralizing antibody                                                                                                                                    |
| 306 | 2VIS | Influenza virus hemagglutinin, (escape) mutant with thr 131 replaced by ile, complexed with a neutralizing antibody                                                                                     |
| 307 | 2VIT | Influenza virus hemagglutinin, mutant with thr 155 replaced by ile, complexed with a neutralizing antibody                                                                                              |
| 308 | 2VIU | Influenza virus hemagglutinin                                                                                                                                                                           |
| 309 | 2VXS | Structure of il-17a in complex with a potent, fully human neutralising antibody                                                                                                                         |
| 310 | 2VXT | Crystal structure of human il-18 complexed to murine reference antibody 125-2h fab                                                                                                                      |
| 311 | 2VXU | Crystal structure of murine reference antibody 125-2h fab fragment                                                                                                                                      |
| 312 | 2VXV | Crystal structure of human igg abt-325 fab fragment                                                                                                                                                     |
| 313 | 2XEF | Human glutamate carboxypeptidase ii in complex with antibody- recruiting molecule arm-p8                                                                                                                |
| 314 | 2XEG | Human glutamate carboxypeptidase ii in complex with antibody- recruiting molecule arm-p4                                                                                                                |
| 315 | 2XEI | Human glutamate carboxypeptidase ii in complex with antibody- recruiting molecule arm-p2                                                                                                                |
| 316 | 2XEJ | Human glutamate carboxypeptidase ii in complex with arm-m4, urea- based inhibitor                                                                                                                       |
| 317 | 2XZQ | Crystal structure analysis of the anti-(4-hydroxy-3-nitrophenyl)- acetyl murine germline monoclonal antibody bbe6.12h3 fab fragment in complex with a phage display derived dodecapeptide yqlrpnaetlrf  |
| 318 | 2Y06 | Crystal structure analysis of the anti-(4-hydroxy-3-nitrophenyl) - acetyl murine germline antibody bbe6.12h3 fab fragment in complex with a phage display derived dodecapeptide gdprpsyishll            |
| 319 | 2Y07 | Crystal structure analysis of the anti-(4-hydroxy-3-nitrophenyl) - acetyl murine germline monoclonal antibody bbe6.12h3 fab fragment in complex with a phage display derived dodecapeptide ppypawhapgni |
| 320 | 2Y36 | Crystal structure analysis of the anti-(4-hydroxy-3-nitrophenyl)- acetyl murine germline antibody bbe6.12h3 fab fragment in complex with a phage display derived dodecapeptide dlwttaiptips             |
| 321 | 2Y7S | Structure of a designed meningococcal antigen (factor h binding protein, mutant g1) inducing broad protective immunity                                                                                  |
| 322 | 2YPV | Crystal structure of the meningococcal vaccine antigen factor h binding protein in complex with a bactericidal antibody                                                                                 |
| 323 | 2YWY | Structure of new antigen receptor variable domain from sharks                                                                                                                                           |
| 324 | 2YWZ | Structure of new antigen receptor variable domain from sharks                                                                                                                                           |
| 325 | 2ZCH | Crystal structure of human prostate specific antigen complexed with an activating antibody                                                                                                              |
| 326 | 2ZCK | Crystal structure of a ternary complex between psa, a substrat-acyl intermediate and an activating antibody                                                                                             |
| 327 | 2ZCL | Crystal structure of human prostate specific antigen complexed with an activating antibody                                                                                                              |
| 328 | 2ZNW | Crystal structure of scfv10 in complex with hen egg lysozyme                                                                                                                                            |
| 329 | 2ZNX | 5-fluorotryptophan incorporated scfv10 complexed to hen egg lysozyme                                                                                                                                    |
| 330 | 2ZPK | Crystal structure of p20.1 fab fragment in complex with its antigen peptide                                                                                                                             |
| 331 | 32C2 | Structure of an activity suppressing fab fragment to cytochrome p450 aromatase                                                                                                                          |
| 332 | 3A67 | Crystal structure of hyhel-10 fv mutant ln31d complexed with hen egg white lysozyme                                                                                                                     |
| 333 | 3A6B | Crystal structure of hyhel-10 fv mutant ln32d complexed with hen egg white lysozyme                                                                                                                     |
| 334 | 3A6C | Crystal structure of hyhel-10 fv mutant ln92d complexed with hen egg white lysozyme                                                                                                                     |
| 335 | 3AUV | Predicting amino acid preferences in the complementarity determining regions of an antibody-antigen recognition interface                                                                               |
| 336 | 3B9K | Crystal structure of cd8alpha-beta in complex with yts 156.7 fab                                                                                                                                        |
| 337 | 3BDY | Dual specific bh1 fab in complex with vegf                                                                                                                                                              |
| 338 | 3BE1 | Dual specific bh1 fab in complex with the extracellular domain of her2/erb-2                                                                                                                            |
| 339 | 3BGF | X-ray crystal structure of the sars coronavirus spike receptor binding domain in complex with f26g19 fab                                                                                                |

|     |      |                                                                                                                                                                                                         |
|-----|------|---------------------------------------------------------------------------------------------------------------------------------------------------------------------------------------------------------|
| 340 | 3BIK | Crystal structure of the pd-1/pd-l1 complex                                                                                                                                                             |
| 341 | 3BIS | Crystal structure of the pd-l1                                                                                                                                                                          |
| 342 | 3BKY | Crystal structure of chimeric antibody c2h7 fab in complex with a cd20 peptide                                                                                                                          |
| 343 | 3BO8 | The high resolution crystal structure of hla-a1 complexed with the mage-a1 peptide                                                                                                                      |
| 344 | 3BT2 | Structure of urokinase receptor, urokinase and vitronectin complex                                                                                                                                      |
| 345 | 3BZ4 | Crystal structure of fab f22-4 in complex with a shigella flexneri 2a o-ag decasaccharide                                                                                                               |
| 346 | 3C09 | Crystal structure the fab fragment of matuzumab (fab72000) in complex with domain iii of the extracellular region of egfr                                                                               |
| 347 | 3C5S | Crystal structure of monoclonal fab f22-4 specific for shigella flexneri 2a o-ag                                                                                                                        |
| 348 | 3C6S | Crystal structure of fab f22-4 in complex with a shigella flexneri 2a o-ag pentadecasaccharide                                                                                                          |
| 349 | 3CVH | How tcr-like antibody recognizes mhc-bound peptide                                                                                                                                                      |
| 350 | 3CXD | Crystal structure of anti-osteopontin antibody 23c3 in complex with its epitope peptide                                                                                                                 |
| 351 | 3D0L | Crystal structure of the hiv-1 broadly neutralizing antibody 2f5 in complex with the gp41 fp-mper hyb3k construct 514gigalflgflgaags528kk-ahx-655kneqelleldkwaslwn671                                   |
| 352 | 3D0V | Crystal structure of the hiv-1 cross neutralizing monoclonal antibody 2f5 in complex with gp41 peptide lleldkwaslwn                                                                                     |
| 353 | 3D9A | High resolution crystal structure structure of hyhel10 fab complexed to hen egg lysozyme                                                                                                                |
| 354 | 3DRO | Crystal structure of the hiv-1 cross neutralizing antibody 2f5 in complex with gp41 peptide elleldkwaslwn grown in ammonium sulfate                                                                     |
| 355 | 3DRQ | Crystal structure of the hiv-1 broadly neutralizing antibody 2f5 in complex with the gp41 fp-mper hyb3k construct 514gigalflgflgaags528kk-ahx-655kneqelleldkwaslwn671 soaked in peg/2-propanol solution |
| 356 | 3DSF | Crystal structure of anti-osteopontin antibody 23c3 in complex with w43a mutated epitope peptide                                                                                                        |
| 357 | 3EBA | Cabhu6 fglw mutant (humanized) in complex with human lysozyme                                                                                                                                           |
| 358 | 3EOA | Crystal structure the fab fragment of efalizumab in complex with lfa-1 i domain, form i                                                                                                                 |
| 359 | 3EOB | Crystal structure the fab fragment of efalizumab in complex with lfa-1 i domain, form ii                                                                                                                |
| 360 | 3ESU | Crystal structure of anthrax-neutralizing single-chain antibody 14b7                                                                                                                                    |
| 361 | 3ESV | Crystal structure of the engineered neutralizing antibody m18                                                                                                                                           |
| 362 | 3ET9 | Crystal structure of the engineered neutralizing antibody 1h                                                                                                                                            |
| 363 | 3ETB | Crystal structure of the engineered neutralizing antibody m18 complexed with anthrax protective antigen domain 4                                                                                        |
| 364 | 3EYV | Anti-lewis y fab fragment with lewis y antigen in the presence of zinc ions                                                                                                                             |
| 365 | 3FMG | Structure of rotavirus outer capsid protein vp7 trimer in complex with a neutralizing fab                                                                                                               |
| 366 | 3G39 | Structure of a lamprey variable lymphocyte receptor                                                                                                                                                     |
| 367 | 3G3A | Structure of a lamprey variable lymphocyte receptor in complex with a protein antigen                                                                                                                   |
| 368 | 3G3B | Structure of a lamprey variable lymphocyte receptor mutant in complex with a protein antigen                                                                                                            |
| 369 | 3GGW | Crystal structure of fab f22-4 in complex with a carbohydrate-mimetic peptide                                                                                                                           |
| 370 | 3GHB | Crystal structure of anti-hiv-1 fab 447-52d in complex with v3 peptide w2rw020                                                                                                                          |
| 371 | 3GHE | Crystal structure of anti-hiv-1 fab 537-10d in complex with v3 peptide mn                                                                                                                               |
| 372 | 3GJF | Rational development of high-affinity t-cell receptor-like antibodies                                                                                                                                   |
| 373 | 3GNM | The crystal structure of the jaa-f11 monoclonal antibody fab fragment                                                                                                                                   |
| 374 | 3GO1 | Crystal structure of anti-hiv-1 fab 268-d in complex with v3 peptide mn                                                                                                                                 |
| 375 | 3HAE | Rational development of high-affinity t-cell receptor-like antibodies                                                                                                                                   |
| 376 | 3HFM | Structure of an antibody-antigen complex. crystal structure of the hy/hel-10 fab-lysozyme complex                                                                                                       |
| 377 | 3HI6 | Crystal structure of intermediate affinity i domain of integrin lfa-1 with the fab fragment of its antibody al-57                                                                                       |
| 378 | 3HMG | Refinement of the influenza virus hemagglutinin by simulated annealing                                                                                                                                  |
| 379 | 3HZK | Crystal structure of s73-2 antibody in complex with antigen kdo(2.4)kdo                                                                                                                                 |
| 380 | 3HZM | Crystal structure of s73-2 antibody in complex with antigen kdo                                                                                                                                         |
| 381 | 3HZV | Crystal structure of s73-2 antibody in complex with antigen kdo(2.8)kdo(2.4)kdo                                                                                                                         |
| 382 | 3HZY | Crystal structure of s73-2 antibody in complex with antigen kdo(2.4)kdo(2.4)kdo                                                                                                                         |
| 383 | 3I02 | Crystal structure of s54-10 antibody in complex with antigen kdo(2.4)kdo(2.4)kdo                                                                                                                        |
| 384 | 3I9G | Crystal structure of the lt1009 (sonenpcizumab) antibody fab fragment in complex with sphingosine-1-phosphate                                                                                           |
| 385 | 3IET | Crystal structure of 237mab with antigen                                                                                                                                                                |
| 386 | 3IF1 | Crystal structure of 237mab in complex with a galnac                                                                                                                                                    |
| 387 | 3IJH | Structure of s67-27 in complex with ko                                                                                                                                                                  |
| 388 | 3IJS | Structure of s67-27 in complex with tsbp                                                                                                                                                                |
| 389 | 3IJY | Structure of s67-27 in complex with kdo(2.8)kdo                                                                                                                                                         |
| 390 | 3IKC | Structure of s67-27 in complex with kdo(2.8)-7-o-methyl-kdo                                                                                                                                             |
| 391 | 3IU3 | Crystal structure of the fab fragment of therapeutic antibody basiliximab in complex with il-2ra (cd25) ectodomain                                                                                      |
| 392 | 3IU4 | Anti neugcg3 ganglioside chimeric antibody chp3                                                                                                                                                         |
| 393 | 3IVK | Crystal structure of the catalytic core of an rna polymerase ribozyme complexed with an antigen binding antibody fragment                                                                               |
| 394 | 3J3O | Conformational shift of a major poliovirus antigen confirmed by immuno-cryogenic electron microscopy: 160s poliovirus and c3-fab complex                                                                |
| 395 | 3J3P | Conformational shift of a major poliovirus antigen confirmed by immuno-cryogenic electron microscopy: 135s poliovirus and c3-fab complex                                                                |
| 396 | 3J5M | Cryo-em structure of the bg505 sosip.664 hiv-1 env trimer with 3 pgv04 fabs                                                                                                                             |
| 397 | 3J70 | Model of gp120, including variable regions, in complex with cd4 and 17b                                                                                                                                 |
| 398 | 3JCC | Structure of simian immunodeficiency virus envelope spikes bound with cd4 and monoclonal antibody 36d5                                                                                                  |
| 399 | 3KS0 | Crystal structure of the heme domain of flavocytochrome b2 in complex with fab b2b4                                                                                                                     |
| 400 | 3L7E | Crystal structure of anti-il-13 antibody c836                                                                                                                                                           |



|     |      |                                                                                                                                                                 |
|-----|------|-----------------------------------------------------------------------------------------------------------------------------------------------------------------|
| 401 | 3LZF | Crystal structure of fab 2d1 in complex with the 1918 influenza virus hemagglutinin                                                                             |
| 402 | 3M18 | Crystal structure of variable lymphocyte receptor vlra.r2.1 in complex with hen egg lysozyme                                                                    |
| 403 | 3M19 | Crystal structure of variable lymphocyte receptor vlra.r5.1                                                                                                     |
| 404 | 3MLR | Crystal structure of anti-hiv-1 v3 fab 2557 in complex with a ny5 v3 peptide                                                                                    |
| 405 | 3MLS | Crystal structure of anti-hiv-1 v3 mab 2557 fab in complex with a hiv-1 gp120 v3 mimotope                                                                       |
| 406 | 3MLT | Crystal structure of anti-hiv-1 v3 fab 2557 in complex with a ug1033 v3 peptide                                                                                 |
| 407 | 3MLU | Crystal structure of anti-hiv-1 v3 fab 2557 in complex with a zam18 v3 peptide                                                                                  |
| 408 | 3MLV | Crystal structure of anti-hiv-1 v3 fab 2557 in complex with an nof v3 peptide                                                                                   |
| 409 | 3MLW | Crystal structure of anti-hiv-1 v3 fab 1006-15d in complex with an mn v3 peptide                                                                                |
| 410 | 3MLX | Crystal structure of anti-hiv-1 v3 fab 3074 in complex with an mn v3 peptide                                                                                    |
| 411 | 3MLY | Crystal structure of anti-hiv-1 v3 fab 3074 in complex with a ur29 v3 peptide                                                                                   |
| 412 | 3MLZ | Crystal structure of anti-hiv-1 v3 fab 3074 in complex with a vi191 v3 peptide                                                                                  |
| 413 | 3NFP | Crystal structure of the fab fragment of therapeutic antibody daclizumab in complex with il-2ra (cd25) ectodomain                                               |
| 414 | 3NGB | Crystal structure of broadly and potently neutralizing antibody vrc01 in complex with hiv-1 gp120                                                               |
| 415 | 3NH7 | Crystal structure of the neutralizing fab fragment abd1556 bound to the bmp type i receptor ia                                                                  |
| 416 | 3NZ8 | Crystal structure of the hiv-2 neutralizing fab fragment 7c8                                                                                                    |
| 417 | 3O2D | Crystal structure of hiv-1 primary receptor cd4 in complex with a potent antiviral antibody                                                                     |
| 418 | 3O4I | Crystal structure of 101f fab bound to 15-mer peptide epitope                                                                                                   |
| 419 | 3O45 | Crystal structure of 101f fab bound to 17-mer peptide epitope                                                                                                   |
| 420 | 3OJD | Anti-indolicidin monoclonal antibody v2d2 (fab fragment)                                                                                                        |
| 421 | 3P0V | Anti-egfr/her3 fab dl11 alone                                                                                                                                   |
| 422 | 3P0Y | Anti-egfr/her3 fab dl11 in complex with domain iii of egfr extracellular region                                                                                 |
| 423 | 3P11 | Anti-egfr/her3 fab dl11 in complex with domains i-iii of the her3 extracellular region                                                                          |
| 424 | 3PGF | Crystal structure of maltose bound mbp with a conformationally specific synthetic antigen binder (sab)                                                          |
| 425 | 3PNW | Crystal structure of the tudor domain of human tdrd3 in complex with an anti-tdrd3 fab                                                                          |
| 426 | 3PP4 | Epitope characterization and crystal structure of ga101 provide insights into the molecular basis for the type i / type ii distinction of anti- cd20 antibodies |
| 427 | 3Q3G | Crystal structure of a-domain in complex with antibody                                                                                                          |
| 428 | 3QA3 | Crystal structure of a-domain in complex with antibody                                                                                                          |
| 429 | 3QG6 | Structural basis for ligand recognition and discrimination of a quorum quenching antibody                                                                       |
| 430 | 3QG7 | Structural basis for ligand recognition and discrimination of a quorum quenching antibody                                                                       |
| 431 | 3QO1 | Monoclinic form of igg1 fab fragment (apo form) sharing same fv as iga                                                                                          |
| 432 | 3QUM | Crystal structure of human prostate specific antigen (psa) in fab sandwich with a high affinity and a pca selective antibody                                    |
| 433 | 3R08 | Crystal structure of mouse cd3epsilon in complex with antibody 2c11 fab                                                                                         |
| 434 | 3SE8 | Crystal structure of broadly and potently neutralizing antibody vrc03 in complex with hiv-1 gp120                                                               |
| 435 | 3SE9 | Crystal structure of broadly and potently neutralizing antibody vrc-pg04 in complex with hiv-1 gp120                                                            |
| 436 | 3SGD | Crystal structure of the mouse mab 17.2                                                                                                                         |
| 437 | 3SKJ | Structural and functional characterization of an agonistic anti-human epha2 monoclonal antibody                                                                 |
| 438 | 3SY0 | S25-2- a(2-8)-a(2-4)kdo trisaccharide complex                                                                                                                   |
| 439 | 3T4Y | S25-2- kdo monosaccharide complex                                                                                                                               |
| 440 | 3T65 | S25-2- a(2-8)kdo disaccharide complex                                                                                                                           |
| 441 | 3T77 | S25-2- a(2-4)kdo disaccharide complex                                                                                                                           |
| 442 | 3THM | Crystal structure of fas receptor extracellular domain in complex with fab ep6b_b01                                                                             |
| 443 | 3TJE | Crystal structure of fas receptor extracellular domain in complex with fab e09                                                                                  |
| 444 | 3U1S | Crystal structure of human fab pgt145, a broadly reactive and potent hiv-1 neutralizing antibody                                                                |
| 445 | 3U2S | Crystal structure of pg9 fab in complex with v1v2 region from hiv-1 strain zm109                                                                                |
| 446 | 3U36 | Crystal structure of pg9 fab                                                                                                                                    |
| 447 | 3UBX | Crystal structure of the mouse cd1d-c20:2-agalcer-l363 mab fab complex                                                                                          |
| 448 | 3UJI | Crystal structure of anti-hiv-1 v3 fab 2558 in complex with mn peptide                                                                                          |
| 449 | 3UJJ | Crystal structure of anti-hiv-1 v3 fab 4025 in complex with con a peptide                                                                                       |
| 450 | 3UJT | Structure of the fab fragment of ab-52, an antibody that binds the o-antigen of francisella tularensis                                                          |
| 451 | 3UOI | Structure of a monoclonal antibody complexed with its mhc-i antigen                                                                                             |
| 452 | 3UYR | Structure of a monoclonal antibody complexed with its mhc-i antigen                                                                                             |
| 453 | 3V4P | Crystal structure of a4b7 headpiece complexed with fab act-1                                                                                                    |
| 454 | 3V4U | Structure of a monoclonal antibody complexed with its mhc-i antigen                                                                                             |
| 455 | 3V4V | Crystal structure of a4b7 headpiece complexed with fab act-1 and ro0505376                                                                                      |
| 456 | 3V52 | Structure of a monoclonal antibody complexed with its mhc-i antigen                                                                                             |
| 457 | 3V6F | Crystal structure of an anti-hbv e-antigen monoclonal fab fragment (e6), unbound                                                                                |
| 458 | 3WIH | Crystal structure of the third fibronectin domain (fn3) of human robo1 in complex with the fab fragment of murine monoclonal antibody b2212a.                   |
| 459 | 3WN5 | Crystal structure of asymmetrically engineered fc variant in complex with fcgr1ia                                                                               |
| 460 | 3X0E | Crystal structure of the ectodomain of human cd81 large extracellular loop (hcd81-lel)                                                                          |
| 461 | 3X0F | Crystal structure of the ectodomain of mouse cd81 large extracellular loop (mcd81-lel)                                                                          |
| 462 | 4A6Y | Crystal structure of fab fragment of anti-(4-hydroxy-3-nitrophenyl)-acetyl murine germline antibody bbe6.12h3                                                   |
| 463 | 4AG4 | Crystal structure of a ddr1-fab complex                                                                                                                         |
| 464 | 4B50 | Crystal structure of the hiv-1 gp41 mper-specific llama vhh 2h10                                                                                                |
| 465 | 4BH7 | Crystal structure of germline antibody 36-65 in complex with peptide ppypawhapgni                                                                               |
| 466 | 4BH8 | Crystal structure of germline antibody 36-65 in complex with peptide gdprpsyishll                                                                               |
| 467 | 4C83 | Crystal structure of the igg2a lpt3 in complex with an 8-sugar inner core analogue of neisseria meningitidis                                                    |

|     |      |                                                                                                                                                  |
|-----|------|--------------------------------------------------------------------------------------------------------------------------------------------------|
| 468 | 4CJD | Crystal structure of neisseria meningitidis trimeric autotransporter and vaccine antigen nada                                                    |
| 469 | 4DAG | Structure of the human metapneumovirus fusion protein with neutralizing antibody identifies a pneumovirus antigenic site                         |
| 470 | 4DGV | Structure of the hepatitis c virus envelope glycoprotein e2 antigenic region 412-423 bound to the broadly neutralizing antibody hcv1, p2(1) form |
| 471 | 4DGY | Structure of the hepatitis c virus envelope glycoprotein e2 antigenic region 412-423 bound to the broadly neutralizing antibody hcv1, c2 form    |
| 472 | 4E9O | Vaccinia d8l ectodomain structure                                                                                                                |
| 473 | 4EBQ | Fab structure of anti-vaccinia virus d8l antigen mouse igg2a la5                                                                                 |
| 474 | 4EDW | Nerve growth factor in complex with fab from humanized version of mouse mab 911 (tanezumab)                                                      |
| 475 | 4EDX | Nerve growth factor in complex with fab from mouse mab 911                                                                                       |
| 476 | 4ETQ | Vaccinia virus d8l imv envelope protein in complex with fab of murine igg2a la5                                                                  |
| 477 | 4F33 | Crystal structure of therapeutic antibody morab-009                                                                                              |
| 478 | 4F3F | Crystal structure of msln7-64 morab-009 fab complex                                                                                              |
| 479 | 4FFV | Crystal structure of dipeptidyl peptidase iv (dpp4, dpp-iv, cd26) in complex with 11a19 fab                                                      |
| 480 | 4FFW | Crystal structure of dipeptidyl peptidase iv (dpp4, dpp-iv, cd26) in complex with fab + sitagliptin                                              |
| 481 | 4FQH | Crystal structure of fab cr9114                                                                                                                  |
| 482 | 4FQI | Crystal structure of fab cr9114 in complex with a h5n1 influenza virus hemagglutinin                                                             |
| 483 | 4G6A | Structure of the hepatitis c virus envelope glycoprotein e2 antigenic region 412-423 bound to the broadly neutralizing antibody ap33             |
| 484 | 4G6F | Crystal structure of 10e8 fab in complex with an hiv-1 gp41 peptide                                                                              |
| 485 | 4GMT | Crystal structure of heterosubtypic fab s139/1                                                                                                   |
| 486 | 4GXU | Crystal structure of antibody 1f1 bound to the 1918 influenza hemagglutinin                                                                      |
| 487 | 4GXV | Crystal structure of anti-influenza virus antibody 1f1                                                                                           |
| 488 | 4GXX | Crystal structure of the 'avianized' 1918 influenza virus hemagglutinin                                                                          |
| 489 | 4H0G | Crystal structure of mimicry-recognizing native 2d10 scfv                                                                                        |
| 490 | 4H0H | Crystal structure of mimicry-recognizing 2d10 scfv with peptide                                                                                  |
| 491 | 4H0I | Crystal structure of scfv-2d10 in complex with methyl alpha-d-mannopyranoside                                                                    |
| 492 | 4H8W | Crystal structure of non-neutralizing and adcc-potent antibody n5-i5 in complex with hiv-1 clade a/e gp120 and scd4.                             |
| 493 | 4HF5 | Crystal structure of fab 8f8 in complex a h2n2 influenza virus hemagglutinin                                                                     |
| 494 | 4HGK | Shark ignar variable domain                                                                                                                      |
| 495 | 4HH9 | Anti-human cytomegalovirus (hcmv) fab ke5                                                                                                        |
| 496 | 4HHA | Anti-human cytomegalovirus (hcmv) fab ke5 with epitope peptide ad-2s1                                                                            |
| 497 | 4HIE | Anti-streptococcus pneumoniae 23f fab 023.102                                                                                                    |
| 498 | 4HIH | Anti-streptococcus pneumoniae 23f fab 023.102 with bound rhamnose.                                                                               |
| 499 | 4HII | Anti-streptococcus pneumoniae 23f fab 023.102 with bound rhamnose-galactose                                                                      |
| 500 | 4HIJ | Anti-streptococcus pneumoniae 23f fab 023.102 with bound l-rhamnose-(1-2)-alpha-d-galactose-(3-o)-phosphate-2-glycerol                           |
| 501 | 4HK0 | Uca fab (unbound) from ch65-ch67 lineage                                                                                                         |
| 502 | 4HK3 | I2 fab (unbound) from ch65-ch67 lineage                                                                                                          |
| 503 | 4HKB | Ch67 fab (unbound) from the ch65-67 lineage                                                                                                      |
| 504 | 4HKX | Influenza hemagglutinin in complex with ch67 fab                                                                                                 |
| 505 | 4HLZ | Crystal structure of fab c179 in complex with a h2n2 influenza virus hemagglutinin                                                               |
| 506 | 4HMG | Refinement of the influenza virus hemagglutinin by simulated annealing                                                                           |
| 507 | 4HWB | Crystal structure of ectodomain 3 of the il-13 receptor alpha 1 in complex with a human neutralizing monoclonal antibody fragment                |
| 508 | 4HXA | Crystal structure of 13d9 fab                                                                                                                    |
| 509 | 4HXB | Crystal structure of 6b9 fab                                                                                                                     |
| 510 | 4I2X | Crystal structure of signal regulatory protein gamma (sirp-gamma) in complex with fabox117                                                       |
| 511 | 4I3R | Crystal structure of the outer domain of hiv-1 gp120 in complex with vrc-pg04 space group p3221                                                  |
| 512 | 4I3S | Crystal structure of the outer domain of hiv-1 gp120 in complex with vrc-pg04 space group p21                                                    |
| 513 | 4JAM | Crystal structure of broadly neutralizing anti-hiv-1 antibody ch103                                                                              |
| 514 | 4JAN | Crystal structure of broadly neutralizing antibody ch103 in complex with hiv-1 gp120                                                             |
| 515 | 4JHA | Crystal structure of rsv-neutralizing human antibody d25                                                                                         |
| 516 | 4JHW | Crystal structure of respiratory syncytial virus fusion glycoprotein stabilized in the prefusion conformation by human antibody d25              |
| 517 | 4JO1 | Crystal structure of rabbit mab r56 fab in complex with v3 crown of hiv-1 jr-fl gp120                                                            |
| 518 | 4JO2 | Crystal structure of rabbit mab r56 fab in complex with v3 crown of hiv-1 consensus a gp120                                                      |
| 519 | 4JO3 | Crystal structure of rabbit mab r20 fab in complex with v3 c-terminus of hiv-1 consensus b gp120                                                 |
| 520 | 4JO4 | Crystal structure of rabbit mab r20 fab                                                                                                          |
| 521 | 4K24 | Structure of anti-upar fab atn-658 in complex with upar                                                                                          |
| 522 | 4K2U | Crystal structure of pfeba-175 f1 in complex with r218 antibody fab fragment                                                                     |
| 523 | 4K15 | Cystal structure of human factor viii c2 domain in a ternary complex with murine inhibitory antibodies 3e6 and g99                               |
| 524 | 4KJY | Complex of high-affinity sirp alpha variant fd6 with cd47                                                                                        |
| 525 | 4KPH | Structure of the fab fragment of n62, a protective monoclonal antibody to the nonreducing end of francisella tularensis o-antigen                |
| 526 | 4KRL | Nanobody/vhh domain 7d12 in complex with domain iii of the extracellular region of egfr, ph 6.0                                                  |
| 527 | 4KRM | Nanobody/vhh domain 7d12 in complex with domain iii of the extracellular region of egfr, ph 3.5                                                  |
| 528 | 4KRO | Nanobody/vhh domain ega1 in complex with the extracellular region of egfr                                                                        |
| 529 | 4KRP | Nanobody/vhh domain 9g8 in complex with the extracellular region of egfr                                                                         |

|     |      |                                                                                                                                                                                           |
|-----|------|-------------------------------------------------------------------------------------------------------------------------------------------------------------------------------------------|
| 530 | 4KV5 | Scfv gc1009 in complex with tgf-beta1.                                                                                                                                                    |
| 531 | 4KXZ | Crystal structure of tgfb2 in complex with gc2008.                                                                                                                                        |
| 532 | 4LQF | Structure of murine igg2b a2c7-fab in complex with vaccinia antigen a33r at the resolution of 2.3 angstroms                                                                               |
| 533 | 4LSS | Crystal structure of broadly and potently neutralizing antibody vrc01 in complex with hiv-1 clade a strain ker_2018_11 gp120                                                              |
| 534 | 4LST | Crystal structure of broadly and potently neutralizing antibody vrc01 in complex with hiv-1 clade c strain zm176.66 gp120                                                                 |
| 535 | 4LU5 | Structure of murine igg2a a20g2-fab in complex with vaccinia antigen a33r at the resolution of 2.9 angstroms                                                                              |
| 536 | 4M1D | Crystal structure of anti-hiv-1 fab 447-52d in complex with v3 cyclic peptide mn                                                                                                          |
| 537 | 4M1G | Structure of murine igg2a a27d7-fab in complex with vaccinia antigen a33r at the resolution of 1.6 angstroms                                                                              |
| 538 | 4M3J | Structure of a single-domain camelid antibody fragment cab-h7s specific of the blap beta-lactamase from bacillus licheniformis                                                            |
| 539 | 4M3K | Structure of a single domain camelid antibody fragment cab-h7s in complex with the blap beta-lactamase from bacillus licheniformis                                                        |
| 540 | 4M5Y | Crystal structure of broadly neutralizing fab 5j8                                                                                                                                         |
| 541 | 4M7J | Crystal structure of s25-26 in complex with kdo(2.8)kdo(2.4)kdo trisaccharide                                                                                                             |
| 542 | 4M7Z | Unliganded 1 crystal structure of s25-26 fab                                                                                                                                              |
| 543 | 4M93 | Unliganded 2 crystal structure of s25-26 fab                                                                                                                                              |
| 544 | 4MA1 | Unliganded 3 crystal structure of s25-26 fab                                                                                                                                              |
| 545 | 4N0Y | Structure of the hepatitis c envelope glycoprotein e1 antigenic region 314-324 bound to the cross-neutralizing antibody igh526                                                            |
| 546 | 4N1H | Structure of a single-domain camelid antibody fragment cab-f11n in complex with the blap beta-lactamase from bacillus licheniformis                                                       |
| 547 | 4NBX | Crystal structure of clostridium difficile toxin a fragment tcda-a1 bound to a20.1 vhh                                                                                                    |
| 548 | 4NBY | Crystal structure of tcda-a2 bound to two molecules of a20.1 vhh                                                                                                                          |
| 549 | 4NBZ | Crystal structure of tcda-a1 bound to a26.8 vhh                                                                                                                                           |
| 550 | 4NC0 | Crystal structure of tcda-a2 bound to a26.8 vhh                                                                                                                                           |
| 551 | 4NC1 | Crystal structure of tcda-a2 bound to a20.1 vhh and a26.8 vhh                                                                                                                             |
| 552 | 4NC2 | Crystal structure of tcdb-b1 bound to b39 vhh                                                                                                                                             |
| 553 | 4NGH | Crystal structure of the hiv-1 neutralizing antibody 4e10 fab fragment in complex with a hydrocarbon-stapled peptide containing the 4e10 epitope on gp41 and a tethered phosphate moiety. |
| 554 | 4NHC | Crystal structure of the hiv-1 neutralizing antibody 4e10 fab fragment in complex with a hydrocarbon-stapled peptide containing the 4e10 epitope on gp41.                                 |
| 555 | 4NIK | Structure of human gankyrin in complex to the single chain antibody f5                                                                                                                    |
| 556 | 4NZR | Crystal structure of the antibody-binding region of protein m (protein m td) in complex with anti-hiv antibody pgt135 fab                                                                 |
| 557 | 4NZT | Crystal structure of the antibody-binding region of protein m (protein m td) in complex with anti-influenza hemagglutinin antibody cr9114 fab                                             |
| 558 | 4NZU | Crystal structure of the primary monoclonal antibody 13pl fab' from a multiple myeloma patient                                                                                            |
| 559 | 4O5L | Crystal structure of broadly neutralizing antibody f045-092                                                                                                                               |
| 560 | 4OLU | Crystal structure of antibody vrc07 in complex with clade a/e 93th057 hiv-1 gp120 core                                                                                                    |
| 561 | 4OLV | Crystal structure of antibody vrc07-g54f in complex with clade a/e 93th057 hiv-1 gp120 core                                                                                               |
| 562 | 4OLW | Crystal structure of antibody vrc07-g54h in complex with clade a/e 93th057 hiv-1 gp120 core                                                                                               |
| 563 | 4OLX | Crystal structure of antibody vrc07-g54l in complex with clade a/e 93th057 hiv-1 gp120 core                                                                                               |
| 564 | 4OLY | Crystal structure of antibody vrc07-g54r in complex with clade a/e 93th057 hiv-1 gp120 core                                                                                               |
| 565 | 4OLZ | Crystal structure of antibody vrc07-g54w in complex with clade a/e 93th057 hiv-1 gp120 core                                                                                               |
| 566 | 4OM0 | Crystal structure of antibody vrc07-g54y in complex with clade a/e 93th057 hiv-1 gp120 core                                                                                               |
| 567 | 4OM1 | Crystal structure of antibody vrc07-i30q, g54w, s58n in complex with clade a/e 93th057 hiv-1 gp120 core                                                                                   |
| 568 | 4OT1 | Structural basis for the recognition of human cytomegalovirus glycoprotein b by the neutralizing human antibody sm5-1                                                                     |
| 569 | 4OTX | Structure of the anti-francisella tularensis o-antigen antibody n203 fab fragment                                                                                                         |
| 570 | 4P49 | The structure of a chicken anti-prostate specific antigen scfv                                                                                                                            |
| 571 | 4P9H | Crystal structure of 8anc195 fab in complex with gp120 of 93th057 hiv-1 and soluble cd4 d1d2                                                                                              |
| 572 | 4PTT | Crystal structure of anti-23f strep fab c05                                                                                                                                               |
| 573 | 4PTU | Crystal structure of anti-23f strep fab c05 with rhamnose                                                                                                                                 |
| 574 | 4Q6I | Crystal structure of murine 2d5 fab, a potent anti-cd4 hiv-1-neutralizing antibody in complex with cd4                                                                                    |
| 575 | 4Q97 | Ignar antibody domain c1                                                                                                                                                                  |
| 576 | 4Q9B | Ignar antibody domain c2                                                                                                                                                                  |
| 577 | 4Q9C | Ignar antibody domain c3                                                                                                                                                                  |
| 578 | 4QEX | Crystal structure of pfeba-175 rii in complex with a fab fragment from inhibitory antibody r217                                                                                           |
| 579 | 4QHU | Crystal structure of il-17a/fab6785 complex                                                                                                                                               |
| 580 | 4QTI | Crystal structure of human upar in complex with anti-upar fab 8b12                                                                                                                        |
| 581 | 4QXG | Antigen binding fragment of an anti ifnar1 antibody                                                                                                                                       |
| 582 | 4R2G | Crystal structure of pgt124 fab bound to hiv-1 jrcsf gp120 core and to cd4                                                                                                                |
| 583 | 4R4H | Crystal structure of non-neutralizing, a32-like antibody 2.2c in complex with hiv-1 env gp120                                                                                             |
| 584 | 4R7D | Fab hu 15c1                                                                                                                                                                               |
| 585 | 4R7N | Fab c2e3                                                                                                                                                                                  |
| 586 | 4R9Y | Crystal structure of kkofab in complex with platelet factor 4                                                                                                                             |
| 587 | 4RAU | Crystal structure of rtotfab in complex with human pf4                                                                                                                                    |
| 588 | 4RRP | Crystal structure of the fab complexed with antigen asf1p, northeast structural genomics consortium (nesg) target pdr16                                                                   |

|     |      |                                                                                                                                                                                                  |
|-----|------|--------------------------------------------------------------------------------------------------------------------------------------------------------------------------------------------------|
| 589 | 4TRP | Crystal structure of monoclonal antibody against neuroblastoma associated antigen.                                                                                                               |
| 590 | 4TUJ | Crystal structure of monoclonal antibody against neuroblastoma associated antigen.                                                                                                               |
| 591 | 4TUK | Crystal structure of monoclonal antibody against neuroblastoma associated antigen.                                                                                                               |
| 592 | 4TUL | Crystal structure of monoclonal antibody against neuroblastoma associated antigen.                                                                                                               |
| 593 | 4TUO | Crystal structure of monoclonal antibody against neuroblastoma associated antigen.                                                                                                               |
| 594 | 4U0Q | Plasmodium falciparum reticulocyte-binding protein homologue 5 (pfrh5) bound to basigin                                                                                                          |
| 595 | 4U3X | Structure of a human vh antibody domain binding to the cleft of hen egg lysozyme                                                                                                                 |
| 596 | 4U6G | Crystal structure of 10e8 fab in complex with a hydrocarbon-stapled hiv-1 gp41 mper peptide                                                                                                      |
| 597 | 4U6V | Mechanisms of neutralization of a human anti-alpha toxin antibody                                                                                                                                |
| 598 | 4UAO | Crystal structure of apical membrane antigen 1 from plasmodium knowlesi in complex with an invasion inhibitory antibody                                                                          |
| 599 | 4UIF | Cryo-em structure of dengue virus serotype 2 in complex with antigen-binding fragments of human antibody 2d22                                                                                    |
| 600 | 4UIH | Cryo-em structure of dengue virus serotype 2 strain new guinea-c complexed with human antibody 2d22 fab at 37 degree c. the fab molecules were added to the virus before 37 degree c incubation. |
| 601 | 4UV6 | Crystal structure of apical membrane antigen 1 from plasmodium knowlesi                                                                                                                          |
| 602 | 4WEU | Co-complex structure of the f4 fimbrial adhesin faeg variant ad with llama single domain antibody v3                                                                                             |
| 603 | 4WHT | Structure of the hepatitis c virus envelope glycoprotein e2 antigenic region 412-423 bound to the broadly neutralizing antibody 3/11, p1 crystal form                                            |
| 604 | 4WHY | Structure of the hepatitis c virus envelope glycoprotein e2 antigenic region 412-423 bound to the broadly neutralizing antibody 3/11, p21 crystal form                                           |
| 605 | 4WUU | Structure of esk1 in complex with hla-a*0201/wt1                                                                                                                                                 |
| 606 | 4XVJ | Structure of the hepatitis c virus envelope glycoprotein e2 antigenic 2 region 412-423 bound to the broadly neutralizing antibody hc33.1                                                         |
| 607 | 4YHP | Crystal structure of 309m3-b fab in complex with h3k9me3 peptide                                                                                                                                 |
| 608 | 4YHY | Crystal structure of 309m3-b in complex with trimethylated lys                                                                                                                                   |
| 609 | 4YHZ | Crystal structure of 304m3-b fab in complex with h3k4me3 peptide                                                                                                                                 |
| 610 | 4YNY | Crystal structure of monoclonal anti-human podoplanin antibody nz-1                                                                                                                              |
| 611 | 4Y0O | Crystal structure of monoclonal anti-human podoplanin antibody nz-1 with bound pa peptide                                                                                                        |
| 612 | 4Z0X | Structure of hepatitis c virus envelope glycoprotein e2 antigenic region 434-446 bound to the broadly neutralizing antibody hc26am                                                               |
| 613 | 4ZD3 | Structure of a transglutaminase 2-specific autoantibody fab fragment                                                                                                                             |
| 614 | 4ZFF | Dual-acting fab 5a12 in complex with vegf                                                                                                                                                        |
| 615 | 4ZFG | Dual-specificity fab 5a12 in complex with angiopoietin 2                                                                                                                                         |
| 616 | 4ZFO | J22.9-xi: chimeric mouse/human antibody against human bcma (cd269)                                                                                                                               |
| 617 | 4ZH7 | Structural basis of lewisb antigen binding by the helicobacter pylori adhesin baba                                                                                                               |
| 618 | 5A1Z | Cryo-em structure of dengue virus serotype 2 strain pvp94-07 complexed with human antibody 2d22 fab at 37 degrees c                                                                              |
| 619 | 5A2I | Crystal structure of scfv-sm3 in complex with apd-sgalnac-rp                                                                                                                                     |
| 620 | 5A2J | Crystal structure of scfv-sm3 in complex with the naked peptide apdtrp                                                                                                                           |
| 621 | 5A2K | Crystal structure of scfv-sm3 in complex with apd-tgalnac-rp                                                                                                                                     |
| 622 | 5A2L | Crystal structure of scfv-sm3 in complex with apd-cgalnac-rp                                                                                                                                     |
| 623 | 5A7X | Negative stain em of bg505 sosip.664 in complex with scd4, 17b, and 8anc195                                                                                                                      |
| 624 | 5A8H | Cryo-et subtomogram averaging of bg505 sosip.664 in complex with scd4, 17b, and 8anc195                                                                                                          |
| 625 | 5AZE | Fab fragment of calcium-dependent antigen binding antibody, 6rl#9                                                                                                                                |
| 626 | 5BW7 | Crystal structure of nonfucosylated fc y296w mutant complexed with bis-glycosylated soluble form of fc gamma receptor iiia                                                                       |
| 627 | 5CMA | Anti-b7-h3 monoclonal antibody ch8h9 fab fragment                                                                                                                                                |
| 628 | 5CP3 | Crystal structure of an antigen-binding fragment of monoclonal antibody against sulfonamides in complex with sulfathiazole                                                                       |
| 629 | 5CP7 | Crystal structure of an antigen-binding fragment of monoclonal antibody against sulfonamides                                                                                                     |
| 630 | 5DFV | Crystal structure of human cd81 large extracellular loop in complex with murine fab fragment k04                                                                                                 |
| 631 | 5DFW | Crystal structure of human cd81 large extracellular loop in complex with single chain fv fragment k13                                                                                            |
| 632 | 5DMI | Structure of the extracellular domain of the cd40 in complex with chi220 fab                                                                                                                     |
| 633 | 5DMJ | Structure of the extracellular domain of the cd40 in complex with 3h56-5 dab                                                                                                                     |
| 634 | 5DWU | Beta common receptor in complex with a fab                                                                                                                                                       |
| 635 | 5ERW | Structure of hcv e2 glycoprotein antigenic epitope ii bound to the broadly neutralizing antibody hc84-26                                                                                         |
| 636 | 5EZI | Crystal structure of fab of parasite invasion inhibitory antibody c1 - hexagonal form                                                                                                            |
| 637 | 5EZJ | Crystal structure of fab of parasite invasion inhibitory antibody c1 - orthorhombic form                                                                                                         |
| 638 | 5EZL | Crystal structure of fab of parasite invasion inhibitory antibody c1 - monoclinic form                                                                                                           |
| 639 | 5EZN | Crystal structure of pfcyrpa                                                                                                                                                                     |
| 640 | 5EZO | Crystal structure of pfcyrpa in complex with an invasion-inhibitory antibody fab.                                                                                                                |
| 641 | 5GGV | Ctla-4 in complex with tremelimumab fab                                                                                                                                                          |
| 642 | 5GKR | Crystal structure of sle patient-derived anti-dna antibody in complex with oligonucleotide                                                                                                       |
| 643 | 5GKS | Crystal structure of sle patient-derived anti-dna antibody                                                                                                                                       |
| 644 | 5HDQ | Mntc co-structure with mab 305-78-7                                                                                                                                                              |
| 645 | 5HMG | Refinement of the influenza virus hemagglutinin by simulated annealing                                                                                                                           |
| 646 | 5I4F | Scfv 2d10 complexed with alpha 1,6 mannobiose                                                                                                                                                    |
| 647 | 5I76 | Crystal structure of fm318, a recombinant fab adopted from cetuximab                                                                                                                             |
| 648 | 5IHL | Structure of the extracellular domain of the cd40 in complex with 3h56-5 dab                                                                                                                     |
| 649 | 5ITB | Crystal structure of the anti-rsv f fab 14n4                                                                                                                                                     |

|     |      |                                                                                                                                                                                                   |
|-----|------|---------------------------------------------------------------------------------------------------------------------------------------------------------------------------------------------------|
| 650 | 5J3D | Crystal structure of human fab 14n4 in complex with post-fusion rsv f                                                                                                                             |
| 651 | 5JO5 | Crystal structure of 10e8 ghv-glv antigen-binding fragment.                                                                                                                                       |
| 652 | 5JOF | Crystal structure of vrc03 ghv-glv antigen-binding fragment.                                                                                                                                      |
| 653 | 5JR1 | Crystal structure of 10e8 ghv-maturel antigen-binding fragment.                                                                                                                                   |
| 654 | 5JUE | Crystal structure of uic2 fab                                                                                                                                                                     |
| 655 | 5JXA | Crystal structure of ligand-free vrc03 antigen-binding fragment.                                                                                                                                  |
| 656 | 5KZP | Structure of the hcv1-c1 antibody-antigen complex                                                                                                                                                 |
| 657 | 5LDN | A viral capsid:antibody complex                                                                                                                                                                   |
| 658 | 5M2C | Structural tuning of cd81lel (space group p32 1 2)                                                                                                                                                |
| 659 | 5M33 | Structural tuning of cd81lel (space group p21)                                                                                                                                                    |
| 660 | 5M3D | Structural tuning of cd81lel (space group p31)                                                                                                                                                    |
| 661 | 5M3T | Structural tuning of cd81lel (space group p64)                                                                                                                                                    |
| 662 | 5M4R | Structural tuning of cd81lel (space group c2)                                                                                                                                                     |
| 663 | 5MO9 | Structure of human trkb receptor ligand binding domain in complex with the fab frgment of antibody ab20                                                                                           |
| 664 | 5N2B | The crystal structure of burkholderia pseudomallei antigen and type i fimbria protein bpsl1626.                                                                                                   |
| 665 | 5N4J | Human fab fragment 10c3 against nhba from neisseria meningitidis                                                                                                                                  |
| 666 | 5N7B | Understanding the singular conformational landscape of the tn antigens: sulfur-for- oxygen substitution in the glycosidic linkage provides new insights into molecular recognition by an antibody |
| 667 | 5N7W | Computationally designed functional antibody                                                                                                                                                      |
| 668 | 5N88 | Crystal structure of antibody bound to viral protein                                                                                                                                              |
| 669 | 5NPH | Structure of the hepatitis c virus strain j4 glycoprotein e2 antigenic region 532-540 bound to the fab fragment of the non-neutralizing antibody dao5                                             |
| 670 | 5NPI | Structure of the hepatitis c virus strain j4 glycoprotein e2 antigenic region 532-540 bound to the single chain variable fragment of the non-neutralizing antibody dao5                           |
| 671 | 5NPJ | Structure of the hepatitis c virus strain jfh1 glycoprotein e2 antigenic region 532-540 bound to the single chain variable fragment of the non-neutralizing antibody dao5                         |
| 672 | 5NST | Human monoclonal antibody with a lair1 insertion                                                                                                                                                  |
| 673 | 5NUZ | Junin virus gp1 glycoprotein in complex with an antibody fab fragment                                                                                                                             |
| 674 | 5O14 | Co-crystal structure of a cross-reactive bactericidal human antibody targeting meningococcal vaccine antigen factor h binding protein                                                             |
| 675 | 5O1R | Human fab 5h2 bound to nhba-c3 from neisseria meningitidis serogroup b                                                                                                                            |
| 677 | 5OPY | Crystal structure of anti-alphavbeta3 integrin fab lm609                                                                                                                                          |
| 678 | 5OWP | Crystal structure of glycopeptide 'gvtsafpdtrpap' in complex with scfv-sm3                                                                                                                        |
| 679 | 5SV3 | Rta1-33/44-198 (rvec) bound to single domain antibody a3c8                                                                                                                                        |
| 680 | 5SV4 | Anti-ricin a-chain single domain antibody a3c8                                                                                                                                                    |
| 681 | 5T6P | Crystal structure of therapeutic mab ar20.5 in complex with muc1 peptide                                                                                                                          |
| 682 | 5T78 | Crystal structure of therapeutic mab ar20.5 in complex with muc1 peptide                                                                                                                          |
| 683 | 5TCX | Crystal structure of human tetraspanin cd81                                                                                                                                                       |
| 684 | 5TIH | Structural basis for inhibition of erythrocyte invasion by antibodies to plasmodium falciparum protein cyrpa                                                                                      |
| 685 | 5TIK | Structural basis for inhibition of erythrocyte invasion by antibodies to plasmodium falciparum protein cyrpa                                                                                      |
| 686 | 5TL5 | Complex between human cd27 and antibody m2177                                                                                                                                                     |
| 687 | 5TLJ | Complex between human cd27 and fab fragments of antibodies m2177 and m2191                                                                                                                        |
| 688 | 5TLK | Complex between human cd27 and fab fragments of antibodies m2177 and h2191                                                                                                                        |
| 689 | 5TRU | Structure of the first-in-class checkpoint inhibitor ipilimumab bound to human ctla-4                                                                                                             |
| 690 | 5TZ2 | Crystal structure of human cd47 ecd bound to fab of c47b222                                                                                                                                       |
| 691 | 5TZZ | Crystal structure of human cd47 ecd bound to fab of c47b161                                                                                                                                       |
| 692 | 5TZU | Crystal structure of human cd47 ecd bound to fab of b6h12.2                                                                                                                                       |
| 693 | 5U1F | Initial contact of hiv-1 env with cd4: cryo-em structure of bg505 ds-sosip trimer in complex with cd4 and antibody pgt145                                                                         |
| 694 | 5U3J | Crystal structure of dh511.1 fab in complex with hiv-1 gp41 mper peptide                                                                                                                          |
| 695 | 5U3N | Crystal structure of dh511.12p fab in complex with hiv-1 gp41 mper peptide                                                                                                                        |
| 696 | 5UCB | Structure of antigen-fab complex with engineered switch residue region.                                                                                                                           |
| 697 | 5UEA | Structure of antigen-fab complex with histone chaperone asf1                                                                                                                                      |
| 698 | 5UEK | Structure of antigen-fab 12e complex with histone chaperone asf1                                                                                                                                  |
| 699 | 5UG0 | Human antibody h2897 in complex with influenza hemagglutinin h1 solomon islands/03/2006                                                                                                           |
| 700 | 5UJZ | Cryoem structure of an influenza virus receptor-binding site antibody-antigen interface - class 1                                                                                                 |
| 701 | 5UK0 | Cryoem structure of an influenza virus receptor-binding site antibody-antigen interface - class 2                                                                                                 |
| 702 | 5UK1 | Cryoem structure of an influenza virus receptor-binding site antibody-antigen interface - class 3                                                                                                 |
| 703 | 5UK2 | Cryoem structure of an influenza virus receptor-binding site antibody-antigen interface - class 4                                                                                                 |
| 704 | 5UR8 | Human antibody fragment (fab) to meningococcal factor h binding protein                                                                                                                           |
| 705 | 5VF2 | Scfv 2d10 re-refined as a complex with trehalose replacing the original alpha-1,6-mannobiose                                                                                                      |
| 706 | 5VL3 | Cd22 d1-d3 in complex with therapeutic fab epratuzumab                                                                                                                                            |
| 707 | 5VN8 | Cryo-em model of b41 sosip.664 in complex with fragment antigen binding variable domain of b12                                                                                                    |
| 708 | 5VXJ | 2.50 a resolution structure of ipad from shigella flexneri in complex with single-domain antibody jmk-e3                                                                                          |
| 709 | 5VXK | 2.55 a resolution structure of ipad from shigella flexneri in complex with single-domain antibody jmk-h2                                                                                          |
| 710 | 5VXL | 2.80 a resolution structure of ipad from shigella flexneri in complex with single-domain antibody jps-g3                                                                                          |
| 711 | 5VXM | 2.05 a resolution structure of ipad from shigella flexneri in complex with single-domain antibody 20ipad                                                                                          |
| 712 | 5VXR | The antigen-binding fragment of mab24 in complex with a peptide from hepatitis c virus e2 epitope i (412-423)                                                                                     |
| 713 | 5VZR | Crystal structure of mers-cov neutralizing antibody g4 fab                                                                                                                                        |
| 714 | 5W2B | Crystal structure of c-terminal domain of ebola (reston) nucleoprotein in complex with fab fragment                                                                                               |
| 715 | 5W9H | Mers s ectodomain trimer in complex with variable domain of neutralizing antibody g4                                                                                                              |

|     |      |                                                                                                                                                                 |
|-----|------|-----------------------------------------------------------------------------------------------------------------------------------------------------------------|
| 716 | 5W9I | Mers s ectodomain trimer in complex with variable domain of neutralizing antibody g4                                                                            |
| 717 | 5W9J | Mers s ectodomain trimer in complex with variable domain of neutralizing antibody g4                                                                            |
| 718 | 5W9K | Mers s ectodomain trimer in complex with variable domain of neutralizing antibody g4                                                                            |
| 719 | 5W9L | Mers s ectodomain trimer in complex with variable domain of neutralizing antibody g4                                                                            |
| 720 | 5W9M | Mers s ectodomain trimer in complex with variable domain of neutralizing antibody g4                                                                            |
| 721 | 5W9N | Mers s ectodomain trimer in complex with variable domain of neutralizing antibody g4                                                                            |
| 722 | 5W9O | Mers s ectodomain trimer in complex with variable domain of neutralizing antibody g4                                                                            |
| 723 | 5W9P | Mers s ectodomain trimer in complex with variable domain of neutralizing antibody g4                                                                            |
| 724 | 5WK4 | Crystal structure of an anti-idiotypic vlr                                                                                                                      |
| 725 | 5WKQ | 2.10 a resolution structure of ipab (residues 74-242) from shigella flexneri                                                                                    |
| 726 | 5WN9 | Structure of antibody 2d10 bound to the central conserved region of rsv g                                                                                       |
| 727 | 5WNA | Structure of antibody 3d3 bound to the central conserved region of rsv g                                                                                        |
| 728 | 5WNB | Structure of antibody 3d3 bound to the linear epitope of rsv g                                                                                                  |
| 729 | 5XBM | Structure of scarb2-jl2 complex                                                                                                                                 |
| 730 | 5XCQ | Crystal structure of p20.1 fv-clasp fragment with its antigen peptide                                                                                           |
| 731 | 5XCR | Crystal structure of p20.1 fv-clasp fragment with its antigen peptide                                                                                           |
| 732 | 5XCS | Crystal structure of 12ca5 fv-clasp fragment with its antigen peptide                                                                                           |
| 733 | 5XCT | Crystal structure of p20.1 fv-clasp fragment with its antigen peptide                                                                                           |
| 734 | 5XCU | Crystal structure of 12ca5 fv-clasp fragment with its antigen peptide                                                                                           |
| 735 | 5XCV | Crystal structure of nz-1 fv-clasp fragment with its antigen peptide                                                                                            |
| 736 | 5XJ3 | Complex structure of ipilimumab-scfv and ctla-4                                                                                                                 |
| 737 | 5XRT | Crystal structure of a/minnesota/11/2010 (h3n2) influenza virus hemagglutinin                                                                                   |
| 738 | 5XWD | Crystal structure of the complex of 059-152-fv and egfr-ecd                                                                                                     |
| 739 | 5YC5 | Crystal structure of human igg-fc in complex with aglycan and optimized fc gamma receptor iiii                                                                  |
| 740 | 5ZV3 | Crystal structure of human anti-tau antibody cbtau-28.1 in complex with its tau peptide                                                                         |
| 741 | 6A3V | Complex structure of human 4-1bb and 4-1bbl                                                                                                                     |
| 742 | 6A3W | Complex structure of 4-1bb and utomilumab                                                                                                                       |
| 743 | 6A76 | Crystal structure of the fab fragment of b5209b, a murine monoclonal antibody specific for the fifth immunoglobulin domain (ig5) of human robo1                 |
| 744 | 6A77 | Crystal structure of the fifth immunoglobulin domain (ig5) of human robo1 in complex with the fab fragment of murine monoclonal antibody b5209b                 |
| 745 | 6A78 | Crystal structure of the fifth immunoglobulin domain (ig5) of human robo1 in complex with the scfv fragment of murine monoclonal antibody b5209b                |
| 746 | 6A79 | Crystal structure of the fifth immunoglobulin domain (ig5) of human robo1 in complex with the mutant scfv fragment (p103a) of murine monoclonal antibody b5209b |
| 747 | 6AL5 | Complex between cd19 (n138q mutant) and b43 fab                                                                                                                 |
| 748 | 6ANA | LI2 fab in complex with anti-kappa vhh domain                                                                                                                   |
| 749 | 6AND | Pinatuzumab fab in complex with anti-kappa vhh domain                                                                                                           |
| 750 | 6ANI | Coltuximab fab in complex with anti-kappa vhh domain                                                                                                            |
| 751 | 6AQ7 | Structure of pom6 fab fragment complexed with mouse prpc                                                                                                        |
| 752 | 6ATT | 39s fab bound to her2 ecd                                                                                                                                       |
| 753 | 6AZZ | Crystal structure of pfs25 in complex with the transmission blocking antibody 1190                                                                              |
| 754 | 6B08 | Crystal structure of pfs25 in complex with the transmission blocking antibody 1276                                                                              |
| 755 | 6B0A | Crystal structure of pfs25 in complex with the transmission blocking antibody 1269                                                                              |
| 756 | 6B0E | Crystal structure of pfs25 in complex with the transmission blocking antibody 1260                                                                              |
| 757 | 6B0G | Crystal structure of pfs25 in complex with the transmission blocking antibody 1245                                                                              |
| 758 | 6B0H | Crystal structure of pfs25 in complex with the transmission blocking antibody 1262                                                                              |
| 759 | 6BE2 | Crystal structure of a polysaccharide-binding human fab (f598)                                                                                                  |
| 760 | 6BE3 | Crystal structure of a polysaccharide-binding human fab (f598) in complex with n-acetyl-d-glucosamine (glcnac)                                                  |
| 761 | 6BE4 | Crystal structure of a polysaccharide-binding human fab (f598) in complex with nona-n-acetyl-d-glucosamine (9nac)                                               |
| 762 | 6BIT | Sirpalpa antibody complex                                                                                                                                       |
| 763 | 6BRB | Novel non-antibody protein scaffold targeting cd40l                                                                                                             |
| 764 | 6BXA | Crystal structure of n-terminal fragment of zebrafish toll-like receptor 5 (tlr5) with lamprey variable lymphocyte receptor 2 (vlr2) bound                      |
| 765 | 6BXC | Crystal structure of n-terminal fragment of zebrafish toll-like receptor 5 (tlr5) with lamprey variable lymphocyte receptor 9 (vlr9) bound                      |
| 766 | 6BXD | Crystal structure of variable lymphocyte receptor 2 (vlr2)                                                                                                      |
| 767 | 6BXE | Crystal structure of variable lymphocyte receptor 9 (vlr9)                                                                                                      |
| 768 | 6BZU | Structure of the hepatitis c virus envelope glycoprotein e2 antigenic region 412-423 bound to the broadly neutralizing antibody 19b3                            |
| 769 | 6BZV | Structure of the hepatitis c virus envelope glycoprotein e2 antigenic region 412-423 bound to the gl precursor of the broadly neutralizing antibody 19b3        |
| 770 | 6BZW | Structure of the hepatitis c virus envelope glycoprotein e2 antigenic region 412-423 bound to the gl precursor of the broadly neutralizing antibody ap33        |
| 771 | 6BZY | Structure of the hepatitis c virus envelope glycoprotein e2 antigenic region 412-423 bound to the 22d11 broadly neutralizing antibody                           |
| 772 | 6C5H | S25-5 fab in complex with chlamydiae-specific lps antigen                                                                                                       |
| 773 | 6C5I | Unliganded s25-5 fab                                                                                                                                            |
| 774 | 6C5J | S25-23 fab in complex with chlamydiae lps (crystal form 1)                                                                                                      |

|     |      |                                                                                                                                                                                                                                                     |
|-----|------|-----------------------------------------------------------------------------------------------------------------------------------------------------------------------------------------------------------------------------------------------------|
| 775 | 6C5K | S25-23 fab in complex with chlamydiaceae lps (crystal form 2)                                                                                                                                                                                       |
| 776 | 6C6X | Crystal structure of middle-east respiratory syndrome (mers) coronavirus neutralizing antibody jc57-14 isolated from a vaccinated rhesus macaque.                                                                                                   |
| 777 | 6C6Y | Crystal structure of middle-east respiratory syndrome (mers) coronavirus neutralizing antibody jc57-14 isolated from a vaccinated rhesus macaque in complex with mers receptor binding domain                                                       |
| 778 | 6C6Z | Crystal structure of potent neutralizing antibody cdc2-c2 in complex with mers-cov s1 rbd                                                                                                                                                           |
| 779 | 6CUJ | Crystal structure of the c-terminal domain of neisserial heparin binding antigen (nhba)                                                                                                                                                             |
| 780 | 6DC3 | Rsv prefusion f bound to rsd5 fab                                                                                                                                                                                                                   |
| 781 | 6DC4 | Rsv-neutralizing human antibody am22                                                                                                                                                                                                                |
| 782 | 6DC5 | Rsv prefusion f in complex with am22 fab                                                                                                                                                                                                            |
| 783 | 6DCV | Crystal structure of human anti-tau antibody cbtau-27.1                                                                                                                                                                                             |
| 784 | 6DCW | Crystal structure of human anti-tau antibody cbtau-27.1 fab in complex with a human tau peptide                                                                                                                                                     |
| 785 | 6DDM | Crystal structure analysis of the epitope of an anti-mica antibody                                                                                                                                                                                  |
| 786 | 6DDR | Crystal structure analysis of the epitope of an anti-mica antibody                                                                                                                                                                                  |
| 787 | 6DDV | Crystal structure analysis of the epitope of an anti-mica antibody                                                                                                                                                                                  |
| 788 | 6DFG | Bg505 md39 sosip trimer in complex with mature bg18 fragment antigen binding                                                                                                                                                                        |
| 789 | 6DFH | Bg505 md64 n332-gt2 sosip trimer in complex with germline-reverted bg18 fragment antigen binding                                                                                                                                                    |
| 790 | 6DG2 | Antigen binding fragment of the pan-ebolavirus monoclonal antibody 6d6                                                                                                                                                                              |
| 791 | 6E62 | Crystal structure of malaria transmission-blocking antigen pfs48/45 6c in complex with antibody 85rf45.1                                                                                                                                            |
| 792 | 6E63 | Crystal structure of malaria transmission-blocking antigen pfs48/45 6c in complex with antibody tb31f                                                                                                                                               |
| 793 | 6E64 | Crystal structure of malaria transmission-blocking antibody 85rf45.1                                                                                                                                                                                |
| 794 | 6E65 | Crystal structure of malaria transmission-blocking antibody tb31f                                                                                                                                                                                   |
| 795 | 6E8V | The crystal structure of bovine ultralong antibody bov-1                                                                                                                                                                                            |
| 796 | 6E9G | The crystal structure of bovine ultralong antibody bov-2                                                                                                                                                                                            |
| 797 | 6E9H | The crystal structure of bovine ultralong antibody bov-3                                                                                                                                                                                            |
| 798 | 6E9I | The crystal structure of bovine ultralong antibody bov-4                                                                                                                                                                                            |
| 799 | 6E9K | The crystal structure of bovine ultralong antibody bov-5                                                                                                                                                                                            |
| 800 | 6E9Q | The crystal structure of bovine ultralong antibody bov-6                                                                                                                                                                                            |
| 801 | 6E9U | The crystal structure of bovine ultralong antibody bov-7                                                                                                                                                                                            |
| 802 | 6EDU | B41 sosip.664 in complex with soluble cd4 (d1-d2), the co-receptor mimicking antibody 21c and the broadly neutralizing antibody 8anc195                                                                                                             |
| 803 | 6EJG | Crystal structure of human cd81 large extracellular loop in complex with single chain fv fragment 4                                                                                                                                                 |
| 804 | 6EJM | Crystal structure of human cd81 large extracellular loop in complex with single chain fv fragment 5                                                                                                                                                 |
| 805 | 6EK2 | Crystal structure of human cd81 large extracellular loop in complex with single chain fv fragment 10                                                                                                                                                |
| 806 | 6EUN | Crystal structure of neisseria meningitidis vaccine antigen nada variant 3                                                                                                                                                                          |
| 807 | 6EUP | Crystal structure of neisseria meningitidis nada variant 3 double mutant a33i-i38l                                                                                                                                                                  |
| 808 | 6EV1 | Crystal structure of antibody against schizophyllan                                                                                                                                                                                                 |
| 809 | 6EV2 | Crystal structure of antibody against schizophyllan in complex with laminarihexaose                                                                                                                                                                 |
| 810 | 6EWB | Crystal structure of gii.4 unsw 2012 p domain in complex with fab 10e9                                                                                                                                                                              |
| 811 | 6FAB | Three-dimensional structure of murine anti-p-azophenylarsenate fab 36-71. 1. x-ray crystallography, site-directed mutagenesis, and modeling of the complex with hapten                                                                              |
| 812 | 6FAX | Complex of human cd40 ectodomain with lob 7.4 fab                                                                                                                                                                                                   |
| 813 | 6FN1 | Zosuquidar and uic2 fab complex of human-mouse chimeric abcb1 (abcb1hm)                                                                                                                                                                             |
| 814 | 6FN4 | Apo form of uic2 fab complex of human-mouse chimeric abcb1 (abcb1hm)                                                                                                                                                                                |
| 815 | 6FRJ | Crystal structure of scfv-sm3 in complex with apd-sethgalnac-rp                                                                                                                                                                                     |
| 816 | 6GK7 | Crystal structure of anti-tau antibody dmcbbtau-27.1, double mutant (s31y, t100i) of cbtau-27.1, in complex with tau peptide a8119b (residues 299-318)                                                                                              |
| 817 | 6GK8 | Crystal structure of anti-tau antibody dmcbbtau-28.1, double mutant (s32r, e35k) of cbtau-28.1, in complex with tau peptide a7731 (residues 52-71)                                                                                                  |
| 818 | 6H2Y | Human fab 1e6 bound to fhbp variant 3 from neisseria meningitidis serogroup b                                                                                                                                                                       |
| 819 | 6I3Z | Fab fragment of an antibody selective for wild-type alpha-1-antitrypsin in complex with its antigen                                                                                                                                                 |
| 820 | 6I9J | Human transforming growth factor beta2 in a tetragonal crystal form                                                                                                                                                                                 |
| 821 | 6IAP | Structure of human nkp46 in complex with antibody nkp46-1 and nkp46-4                                                                                                                                                                               |
| 822 | 6JMQ | Lat1-cd98hc complex bound to mem-108 fab                                                                                                                                                                                                            |
| 823 | 6JMR | Cd98hc extracellular domain bound to hbj127 fab and mem-108 fab                                                                                                                                                                                     |
| 824 | 6K4Z | Single-chain fv antibody of c6 complexed with 2-(4-hydroxy-3-nitrophenyl)acetic acid                                                                                                                                                                |
| 825 | 6K7O | Complex structure of lilrb4 and h128-3 antibody                                                                                                                                                                                                     |
| 826 | 6KN9 | Crystal structure of human interleukin 18 receptor beta extracellular domain in complex with an antagonistic scfv                                                                                                                                   |
| 827 | 6MH2 | Structure of herceptin fab without antigen                                                                                                                                                                                                          |
| 828 | 6MHR | Structure of the human 4-1bb / urelumab fab complex                                                                                                                                                                                                 |
| 829 | 6MI2 | Structure of the human 4-1bb / utomilumab fab complex                                                                                                                                                                                               |
| 830 | 6MN7 | Cryo-em structure of bg505.sosip.664 in complex with bf520.1 antigen binding fragment                                                                                                                                                               |
| 831 | 6MPG | Cryo-em structure at 3.2 a resolution of hiv-1 fusion peptide-directed antibody, a12v163-b.01, elicited by vaccination of rhesus macaques, in complex with stabilized hiv-1 env bg505 ds-sosip, which was also bound to antibodies vrc03 and pgt122 |
| 832 | 6MPH | Cryo-em structure at 3.8 a resolution of hiv-1 fusion peptide-directed antibody, df1w-a.01, elicited by vaccination of rhesus macaques, in complex with stabilized hiv-1 env bg505 ds-sosip, which was also bound to antibodies vrc03 and pgt122    |
| 833 | 6MQC | Vaccine-elicited nhp fp-targeting neutralizing antibody 0pv-c.01 in complex with fp (residue 512-519)                                                                                                                                               |

|     |      |                                                                                                                                                          |
|-----|------|----------------------------------------------------------------------------------------------------------------------------------------------------------|
| 834 | 6MQE | Vaccine-elicited nhp fp-targeting hiv neutralizing antibody dfph-a.15 in complex with hiv fusion peptide (residue 512-519)                               |
| 835 | 6MQM | Vaccine-elicited nhp fp-targeting neutralizing antibody df1w-a.01 in complex with hiv fusion peptide (residue 512-519)                                   |
| 836 | 6MQR | Vaccine-elicited nhp fp-targeting neutralizing antibody 0pv-a.01 in complex with fp (residue 512-519)                                                    |
| 837 | 6MQS | Vaccine-elicited nhp fp-targeting hiv neutralizing antibody a12v163-a.01 in complex with hiv fusion peptide (residue 512-519)                            |
| 838 | 6N16 | Vaccine-elicited nhp fp-targeting neutralizing antibody 0pv-b.01 in complex with hiv fusion peptide (residue 512-519)                                    |
| 839 | 6N1V | Cryo-em structure at 4.0 a resolution of vaccine-elicited antibody a12v163-a.01 in complex with hiv-1 env bg505 ds-sosip, and antibodies vrc03 and pg122 |
| 840 | 6N1W | Cryo-em structure at 4.2 a resolution of vaccine-elicited antibody dfph-a.15 in complex with hiv-1 env bg505 ds-sosip, and antibodies vrc03 and pg122    |
| 841 | 6N5B | Broadly protective antibodies directed to a subdominant influenza hemagglutinin epitope                                                                  |
| 842 | 6N5D | Broadly protective antibodies directed to a subdominant influenza hemagglutinin epitope                                                                  |
| 843 | 6N5E | Broadly protective antibodies directed to a subdominant influenza hemagglutinin epitope                                                                  |
| 844 | 6N6B | The complex crystal structure of neuraminidase from a/minnesota/11/2010 with b10 antibody.                                                               |
| 845 | 6NB5 | Crystal structure of anti- mers-cov human neutralizing lca60 antibody fab fragment                                                                       |
| 846 | 6NB8 | Crystal structure of anti- sars-cov human neutralizing s230 antibody fab fragment                                                                        |
| 847 | 6NC2 | Amc011 v4.2 sosip env trimer in complex with fusion peptide targeting antibody acs202 fragment antigen binding                                           |
| 848 | 6NC3 | Amc011 v4.2 sosip env trimer in complex with fusion peptide targeting antibody vrc34 fragment antigen binding                                            |
| 849 | 6NEX | Fab fragment of anti-cocaine antibody h2e2                                                                                                               |
| 850 | 6NF2 | Cryo-em structure of vaccine-elicited antibody 0pv-c.01 in complex with hiv-1 env bg505 ds-sosip and antibodies vrc03 and pg122                          |
| 851 | 6NF5 | Bg505 md64 n332-gt5 sosip trimer in complex with bg18-like precursor hmp1 fragmentantigen binding and base-binding rm20a3 fragment antigen binding       |
| 852 | 6NFC | Bg505 md64 n332-gt5 sosip trimer in complex with bg18-like precursor hmp42 fragmentantigen binding and base-binding rm20a3 fragment antigen binding      |
| 853 | 6NMR | Blocking fab 119 anti-sirp-alpha antibody in complex with sirp-alpha variant 1                                                                           |
| 854 | 6NMS | Blocking fab 136 anti-sirp-alpha antibody in complex with sirp-alpha variant 1                                                                           |
| 855 | 6NMT | Non-blocking fab 3 anti-sirp-alpha antibody in complex with sirp-alpha variant 1                                                                         |
| 856 | 6NMU | Kick-off fab 115 anti-sirp-alpha antibody in complex with sirp-alpha variant 1                                                                           |
| 857 | 6NMV | Non-blocking fab 218 anti-sirp-alpha antibody in complex with sirp-alpha variant 1                                                                       |
| 858 | 6O9B | Crystal structure of hla-a3*01 in complex with a wild-type beta-catenin peptide                                                                          |
| 859 | 6O9C | Crystal structure of hla-a3*01 in complex with a mutant beta-catenin peptide                                                                             |
| 860 | 6OGX | Ternary complex of ox40r (tnfrsf4) bound to fab1 and fab2                                                                                                |
| 861 | 6OKM | Human ox40r (tnfrsf4) bound to fab 3c8                                                                                                                   |
| 862 | 6OKN | Ox40r (tnfrsf4) bound to fab 1a7                                                                                                                         |
| 863 | 6OOR | Structure of 1b1 bound to mouse cd1d                                                                                                                     |
| 864 | 6OSY | Cryo-em structure of vaccine-elicited antibody 0pv-a.01 in complex with hiv-1 env bg505 ds-sosip and antibodies vrc03 and pg122                          |
| 865 | 6OT1 | Cryo-em structure of vaccine-elicited antibody 0pv-b.01 in complex with hiv-1 env bg505 ds-sosip and antibodies vrc03 and pg122                          |
| 866 | 6P62 | Hiv env bg505 nfl td+ in complex with antibody e70 fragment antigen binding                                                                              |
| 867 | 6P65 | Hiv env 16055 nfl td 2cc+ in complex with antibody 1c2 fragment antigen binding                                                                          |
| 868 | 6PE8 | Crystal structure of cd40/abbv-323 fab complex                                                                                                           |
| 869 | 6PE9 | Crystal structure of cd40 complexed to fab516                                                                                                            |
| 870 | 6PHB | Pfs25 in complex with the human transmission blocking antibody 2530                                                                                      |
| 871 | 6PHC | Pfs25 in complex with the human transmission blocking antibody 2544                                                                                      |
| 872 | 6PHD | Pfs25 in complex with the human transmission blocking antibody 2586                                                                                      |
| 873 | 6PHF | Pfs25 in complex with the human transmission blocking antibody 2587                                                                                      |
| 874 | 6PHG | Predicted germline variant of human transmission blocking antibody 2544                                                                                  |
| 875 | 6PHH | Unliganded human transmission blocking antibody 2544                                                                                                     |
| 876 | 6PI7 | Crystal structure of the tdrd2 extended tudor domain in complex with an antibody fragment and the piwil1 peptide                                         |
| 877 | 6PYC | Structure of kappa-on-heavy (koh) antibody fab bound to the cardiac hormone marinobufagenin                                                              |
| 878 | 6PYD | Structure of 3e9 antibody fab bound to marinobufagenin                                                                                                   |
| 879 | 6PZW | Cryoem derived model of na-22 fab in complex with n9 shanghai2                                                                                           |
| 880 | 6RPS | X-ray crystal structure of carbonic anhydrase xii complexed with a theranostic monoclonal antibody fragment                                              |
| 881 | 6S3T | P46, an immunodominant surface protein from mycoplasma hyopneumoniae                                                                                     |
| 882 | 6U02 | Cryoem-derived model of na-63 fab in complex with n9 shanghai2                                                                                           |
| 883 | 6U1T | Crystal structure of anti-nipah virus (niv) f 5b3 antibody fab fragment                                                                                  |
| 884 | 6U59 | Hiv-1 b41 sosip.664 in complex with rabbit antibody 13b                                                                                                  |
| 885 | 6UG7 | Complex of ch28/11 fab and ssea-4 (tetragonal form)                                                                                                      |
| 886 | 6UG8 | Complex of ch28/11 fab and ssea-4 (monoclinic form)                                                                                                      |
| 887 | 6UG9 | Complex of ch28/11 fab and ssea-4 (hexagonal form)                                                                                                       |
| 888 | 6UGA | Ch28/11 fab (monoclinic form)                                                                                                                            |



---

**Table 1.** Experimentally determined antigen-antibody complex structures inside Protein Data Bank (PDB [\[1\]](#)) as of February 29, 2020. All the structures were retrieved from the PDB [\[1\]](#) website with a text search **antigen antibody**.

1. Berman, H.; Henrick, K.; Nakamura, H. Announcing the worldwide Protein Data Bank. *Nature Structural & Molecular Biology* **2003**, *10*, 980–980.
