# Supplementary material for: Extracting the Interfacial Electrostatic Features from Experimentally Determined Antigen and/or Antibody-Related Structures inside Protein Data Bank for Machine Learning-Based Antibody Design
Source: Preprints.org preprint supplement (doi:10.20944/preprints202003.0011.v1), 2020-03-01
Supplement: Supplementary file 3 [file supplementary]

Archive with 2 entries (2 files):
- scan.zip
- template.pdf
